# Supplementary material for: Multi-objective synthesis optimization and kinetics of a sustainable terpolymer
Source: Royal Society of Chemistry journal article supplement (doi:10.1039/d4dd00233d), 2024-01-01
Supplement: d4dd00233d1.pdf [file d4dd00233d1.pdf]

## **Supporting Information**

# Multi-Objective Synthesis Optimization and Kinetics of a Sustainable Terpolymer

Jin Da Tan<sup>1,2#</sup>, Andre KY Low<sup>1,3#</sup>, Shannon Thoi Rui Ying<sup>4</sup>, Sze Yu Tan<sup>1</sup>, Wenguang Zhao<sup>4</sup>,  
Yee-Fun Lim<sup>1,4</sup>, Qianxiao Li<sup>5,6</sup>, Saif A. Khan<sup>2,7</sup>, Balamurugan Ramalingam<sup>1,4\*</sup> and  
Kedar Hippalgaonkar<sup>1,3,5\*</sup>

Correspondence to [kedar@ntu.edu.sg](mailto:kedar@ntu.edu.sg), [balamurugan\\_ramalingam@imre.a-star.edu.sg](mailto:balamurugan_ramalingam@imre.a-star.edu.sg)

<sup>1</sup> Institute of Materials Research and Engineering (IMRE), Agency for Science Technology and Research (A\*STAR), 2 Fusionopolis Way, Innovis #08-03, Singapore 138634, Republic of Singapore.

<sup>2</sup> National University of Singapore Graduate School, Integrative Sciences and Engineering Programme, 21 Lower Kent Ridge Road, Singapore 119077, Republic of Singapore.

<sup>3</sup> School of Materials Science and Engineering, Nanyang Technological University, Singapore 639798, Republic of Singapore.

<sup>4</sup> Institute of Sustainability for Chemicals, Energy and Environment (ISCE<sup>2</sup>), Agency for Science Technology and Research (A\*STAR), 1 Pesek Road, Singapore 627833, Republic of Singapore.

<sup>5</sup> Institute of Functional Intelligent Materials, National University of Singapore, 4 Science Drive 2, Singapore 117544, Republic of Singapore.

<sup>6</sup> Department of Mathematics, National University of Singapore, Singapore 119076, Republic of Singapore.

<sup>7</sup> Department of Chemical and Biomolecular Engineering, National University of Singapore, 4 Engineering Drive 4, Singapore 117585, Singapore

# Authors contributed equally

\* Corresponding authors

## Table of Contents

|                                                                                                                       |           |
|-----------------------------------------------------------------------------------------------------------------------|-----------|
| <b>1. <i>GitHub Repositories</i></b> .....                                                                            | <b>2</b>  |
| 1.2. Terpolymer NMR, DSC and GPC Data .....                                                                           | 3         |
| 1.3. Bayesian Optimization Code .....                                                                                 | 3         |
| 1.4. Ternary Reactivity Ratio Calculation .....                                                                       | 3         |
| <b>2. <i>Experimental Methods</i></b> .....                                                                           | <b>3</b>  |
| 2.1. Synthesis of Terpolymers and Copolymers for Characterization .....                                               | 4         |
| 2.2. Kinetic Data for Terpolymer Synthesis .....                                                                      | 5         |
| 2.3. Analytical Data Collected for Validating the Terpolymer Formation .....                                          | 5         |
| 2.4. <sup>1</sup> H, <sup>13</sup> C and <sup>2</sup> D NMR data for Synthesized Terpolymer .....                     | 6         |
| 2.5. GPC Studies of Terpolymer and Copolymers .....                                                                   | 12        |
| 2.6. DSC Study of Terpolymer and Copolymers .....                                                                     | 16        |
| <b>3. <i>Terpolymer Data</i></b> .....                                                                                | <b>17</b> |
| 3.1. Summary of all Initial Monomer Feed and Experimental Conditions .....                                            | 17        |
| 3.2. Summary of <sup>1</sup> H Integration Values for Reaction Mixture Prior to Reaction .....                        | 19        |
| 3.3. Summary of <sup>1</sup> H Integration Values for Reaction Mixture After Reaction Prior to<br>Precipitation ..... | 22        |
| 3.4. Summary of Monomer Conversion Values for All Samples .....                                                       | 24        |
| 3.5. Summary of Monomer <sup>1</sup> H Integration Values for Terpolymer Samples .....                                | 26        |
| 3.6. Summary of <sup>1</sup> H Protons per Integration for Terpolymer Samples .....                                   | 29        |
| 3.7. Summary of Monomer Incorporation in All Terpolymer Samples .....                                                 | 31        |
| 3.8. Summary of Molecular Weight Statistics for All Terpolymer Samples .....                                          | 33        |
| 3.9. Summary of <i>T<sub>g</sub></i> and Negative Styrene Incorporation for All Terpolymer Samples .....              | 36        |
| 3.10. Relationships Between Terpolymer Variables .....                                                                | 39        |

### **1. GitHub Repositories**

The data and software that support the findings of this study are openly available in GitHub Repositories.

### **1.2. Terpolymer NMR, DSC and GPC Data**

All data, including NMR spectra, DSC trace and GPC trace of all terpolymer samples synthesized are included in the GitHub repository: <https://github.com/TanJinDa-94/April-2024-Terpolymer>. Tables summarizing the terpolymer details are also included in the SI in the subsequent sections.

### **1.3. Bayesian Optimization Code**

The code for carrying out random initial Sobol sampling, and Bayesian Optimization can be found in: <https://github.com/andrelowky/Styrene-Terpolymer-Optimization>

### **1.4. Ternary Reactivity Ratio Calculation**

The code and theory for calculating the ternary reactivity ratios can be found in: <https://github.com/LiQianxiao/Generalized-Mayo-Lewis-Calculator>.

## **2. Experimental Methods**

Prior to terpolymer synthesis, all monomers, namely Styrene, Myrcene, and DBI, were first passed through basic Al<sub>2</sub>O<sub>3</sub> for inhibitor removal before being transferred into the reactor. AIBN was used as the radical initiator according to the calculated molar ratio. To quantify the monomer conversion, 1.6 mL of DMF was added to a 20 mL Biotage sealable microwave reaction vial as an internal standard. The individual monomers were added to the reaction vial according to the calculated molar ratio and the reaction vial was sealed with a rubber septum. Subsequently, the reaction mixture was degassed for 30 minutes in an ice bath to remove any dissolved gases and to create an inert atmosphere within the sealed tube. At this stage, a small aliquot of the reaction mixture was extracted for <sup>1</sup>H NMR analysis, serving as the baseline for monomer calculations. The sealed tubes were then transferred to a heating element, and the temperature was set to the suggested reaction temperature. The reactions were allowed to proceed for the specified reaction time. Once the reactions were completed, another small aliquot of the reaction mixture was taken for <sup>1</sup>H NMR analysis to determine the monomer conversion after the reaction. To isolate the terpolymer, the reaction mixture was immediately added dropwise into an excess amount of methanol (>100 mL) under stirring, leading to precipitation of the polymer. Careful decantation was performed to remove the excess methanol, and the precipitated polymer was subsequently dissolved in a minimal amount of DCM. To further purify the terpolymer, the dissolved polymer in DCM was added dropwise into an excess amount of methanol (>100 mL) while stirring for a second precipitation. Again, the excess methanol was carefully decanted, and the precipitated polymer was dissolved in DCM.

The DCM solvent was then removed by evaporation using a rotary evaporator, leaving behind the purified terpolymer. The terpolymer was subsequently dried overnight in a vacuum oven set at 50 degrees Celsius to remove any residual solvent or moisture. For further analysis, small samples of the terpolymer were taken. One sample was dissolved in deuterated methylene chloride for  $^1\text{H}$  NMR analysis, allowing for the quantification of monomer incorporation within the terpolymer. A second sample was used for differential scanning calorimetry (DSC) analysis to determine the glass transition temperature ( $T_g$ ) of the terpolymer. A third sample was diluted in THF and used for Gel Permeation Chromatography (GPC) analysis. Gel permeation chromatography (GPC) was conducted on a Viscotek TDAmix, which consists of three components. The GPCmax integrated solvent and sample delivery module, the TDA 302 Triple Detector Array, and the OmniSEC software. The TDA 302 incorporates RI and, Light Scattering detectors and viscometer. Only RI detector was used. 2 columns: 2 x PLgel 10  $\mu\text{m}$  Mixed-B (500 to 10,000,000) and 1 guard column (10  $\mu\text{m}$ ) were applied in sequence for separation. THF was used as the eluent at 1.0 mL/min with column and detector temperature at 40  $^\circ\text{C}$ . The apparent molecular weight and dispersity ( $M_w/M_n$ ) were determined with the conventional linear calibration based on polystyrene standards with calibration range of 580 to 3,000,000 Da. The thermal transitions of the samples are measured using Differential Scanning Calorimeter (TA Instruments, DSC Q100). The sample is crimped in the hermetic aluminium pan, and subjected to a heat-cool-heat profile under nitrogen atmosphere with the flow rate of 50ml/min. Sample is first ramped to 150  $^\circ\text{C}$  with the ramp rate of 20 $^\circ\text{C}/\text{min}$ , followed by a cool cycle to -80  $^\circ\text{C}$  and then heated to 100  $^\circ\text{C}$  at the rate of 10  $^\circ\text{C}/\text{min}$ . The first heat cycle was to remove any thermal history inherent to the received samples. The glass transition of the sample is shown as a step from the heat flow traces due to the change in the heat capacity. The glass transition reported is the inflection point of the step, determined from the second heat cycle.

## **2.1. Synthesis of Terpolymers and Copolymers for Characterization**

Styrene (1.04 g, 10.0 mmol), Myrcene (1.36 g, 10.0 mmol), DBI (2.42 g, 10.0 mmol), and azobisisobutyronitrile (AIBN) (0.05 g, 0.30 mmol, 1.0 mmol with respect to 30.0 mmol of monomers) were taken in a Schlenk tube. The reaction mixture was purged with nitrogen for 10 minutes by keeping the contents at 0 $^\circ\text{C}$ . Vacuum was applied carefully for 2-3 minutes, followed by filling with nitrogen by gently turning the knob for three repeats. The contents were then placed in an oil bath and heated to 80 $^\circ\text{C}$ , maintaining that temperature for 4 hours.

The viscous reaction mixture was precipitated by adding dropwise to methanol (200 mL). The precipitated polymer was dried and analysed using NMR, GPC, and DSC measurements.

For kinetic studies, 0.8 mL of DMF was added as an internal standard to determine the conversion. Samples were taken every 30 minutes and analysed by  $^1\text{H}$  NMR. The conversion of Styrene, Myrcene and DBI was calculated and tabulated below using the  $^1\text{H}$  NMR.

## 2.2. Kinetic Data for Terpolymer Synthesis

| Time (min) | Conversion (%) |         |       |         |
|------------|----------------|---------|-------|---------|
|            | Styrene        | Myrcene | DBI   | Overall |
| 0          | 0              | 0       | 0     | 0.00    |
| 30         | 9.30           | 13.19   | 13.83 | 12.18   |
| 60         | 17.44          | 32.97   | 27.66 | 26.20   |
| 90         | 23.26          | 42.86   | 37.23 | 34.69   |
| 120        | 30.23          | 51.65   | 45.74 | 42.80   |
| 150        | 36.05          | 59.34   | 50.00 | 48.71   |
| 180        | 37.21          | 62.64   | 53.19 | 51.29   |
| 210        | 38.37          | 67.03   | 58.51 | 54.98   |
| 240        | 38.37          | 67.03   | 58.51 | 54.98   |

*Table S1. Summary of Kinetic Data for Terpolymer Synthesis. The individual conversion of monomers Styrene, Myrcene and DBI, as well as the overall conversion of all monomers.  $^1\text{H}$  NMR peaks at 6.75 ppm, 6.41 ppm, 5.71 ppm were used for calculating conversion of Styrene, Myrcene and DBI respectively against DMF (8.03 ppm) as an internal standard.*

## 2.3. Analytical Data Collected for Validating the Terpolymer Formation

The copolymers Styrene/Myrcene, Myrcene/DBI and DBI/Styrene were synthesized under identical conditions used for terpolymer synthesis. The consolidated Mn, Mn, PDI and  $T_g$  values for the terpolymer, copolymers and homopolymers are given in the table below. The copolymerization of pairwise combinations of styrene, myrcene, and DBI as well as homopolymerisation of individual monomers under identical conditions also provided for reference and comparison:

| S. No. | Monomer feed (mol %) |         |     | Molecular Weight Distribution (MWD) |    |     | $T_g$ ( $^{\circ}\text{C}$ ) | Overall Conversion (%) |
|--------|----------------------|---------|-----|-------------------------------------|----|-----|------------------------------|------------------------|
|        | Styrene              | Myrcene | DBI | Mn                                  | Mw | PDI |                              |                        |

|   |       |       |       |       |       |      |       |      |
|---|-------|-------|-------|-------|-------|------|-------|------|
| 1 | 33.33 | 33.33 | 33.33 | 14150 | 25700 | 1.82 | -17.5 | 51.3 |
| 2 | 50    | 50    | 0     | 4700  | 10400 | 2.21 | n.d.* | 25.4 |
| 3 | 50    | 0     | 50    | 15600 | 26600 | 1.71 | 36.2  | 69.7 |
| 4 | 0     | 50    | 50    | 17600 | 30800 | 1.75 | -31.8 | 48.4 |
| 5 | 100   | 0     | 0     | 12500 | 27060 | 2.14 | 91.8  | 65.4 |
| 6 | 0     | 100   | 0     | 6160  | 10440 | 1.65 | -61.9 | 16.4 |
| 7 | 0     | 0     | 100   | 13650 | 22400 | 1.61 | -8.6  | 30.2 |

**Table S2. Summary of Kinetic Data for Terpolymer Synthesis.** The individual conversion of monomers Styrene, Myrcene and DBI, as well as the overall conversion of all monomers. \* No polymer isolated upon precipitation with methanol. Only milky emulsion formed. No attempts were made to change the precipitation methods; Reaction temperature = 80 °C; AIBN = 1 mol % with respect to total monomer concentration; Neat conditions

#### 2.4. <sup>1</sup>H, <sup>13</sup>C and <sup>2</sup>D NMR data for Synthesized Terpolymer

The carbons of the terpolymer are labelled as shown in the figure below for easier assignment of respective protons and carbon signals:

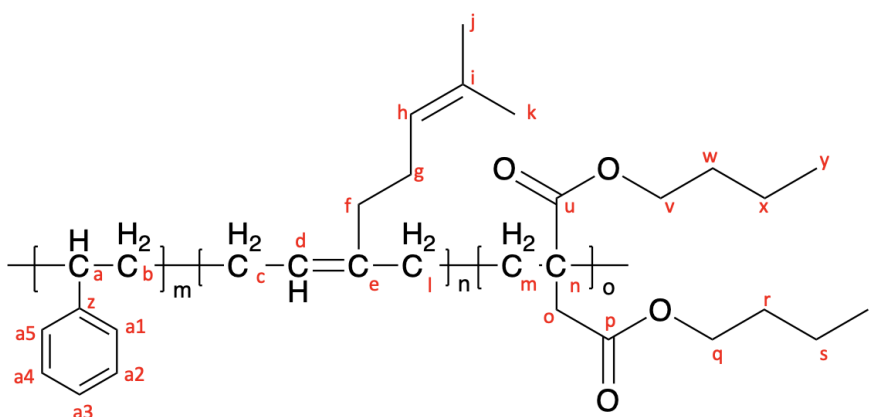

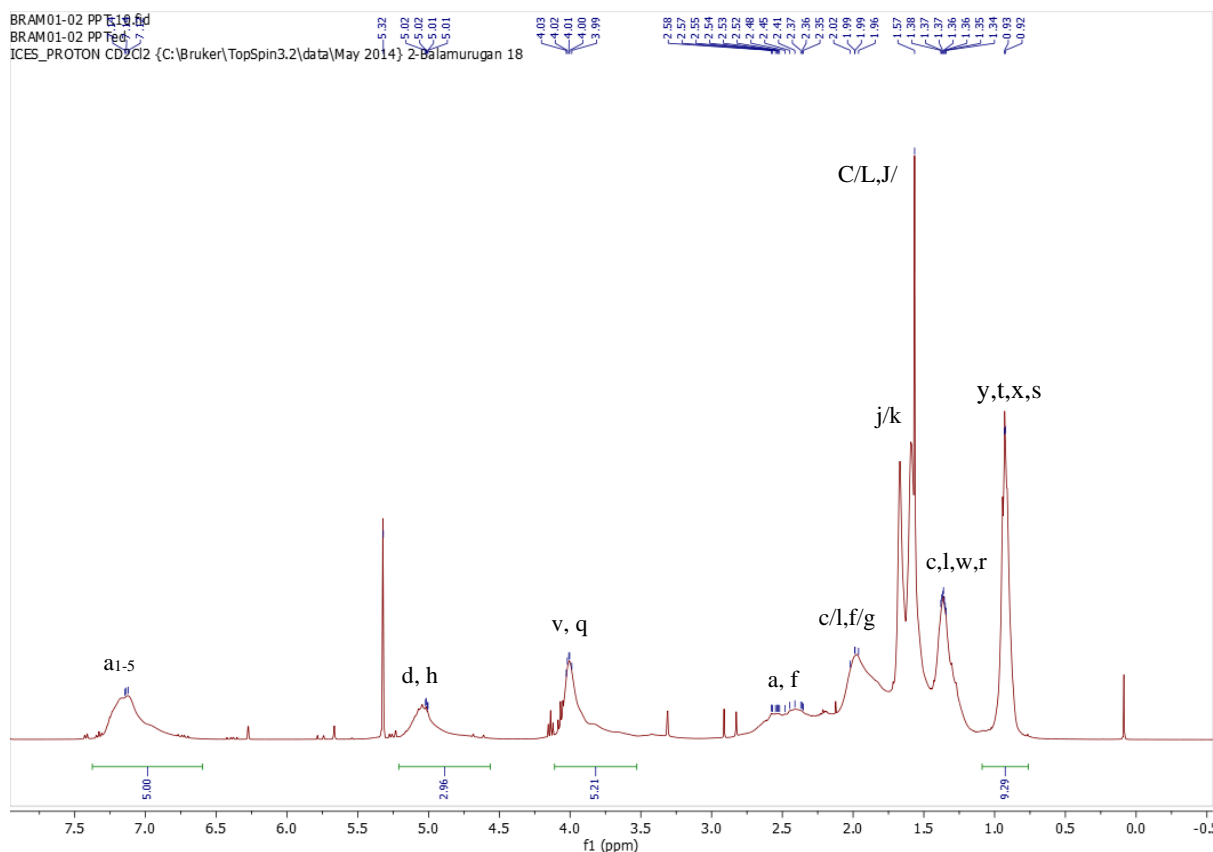

**Figure S1.**  $^1\text{H}$  NMR of spectrum of Styrene-Myrcene-DBI terpolymer synthesized from an equimolar feed ratio of all monomers. Peaks assigned based on HSQC spectrum and literature data on myrcene/DBI copolymers.<sup>1</sup> The broad peaks observed at 7.2 ppm, 5.0 ppm and 4.0 ppm are respectively assigned to the protons of styrene, myrcene and DBI. The ratio of styrene, myrcene and DBI are calculated as ratio of 27.4:36.3:36.3.

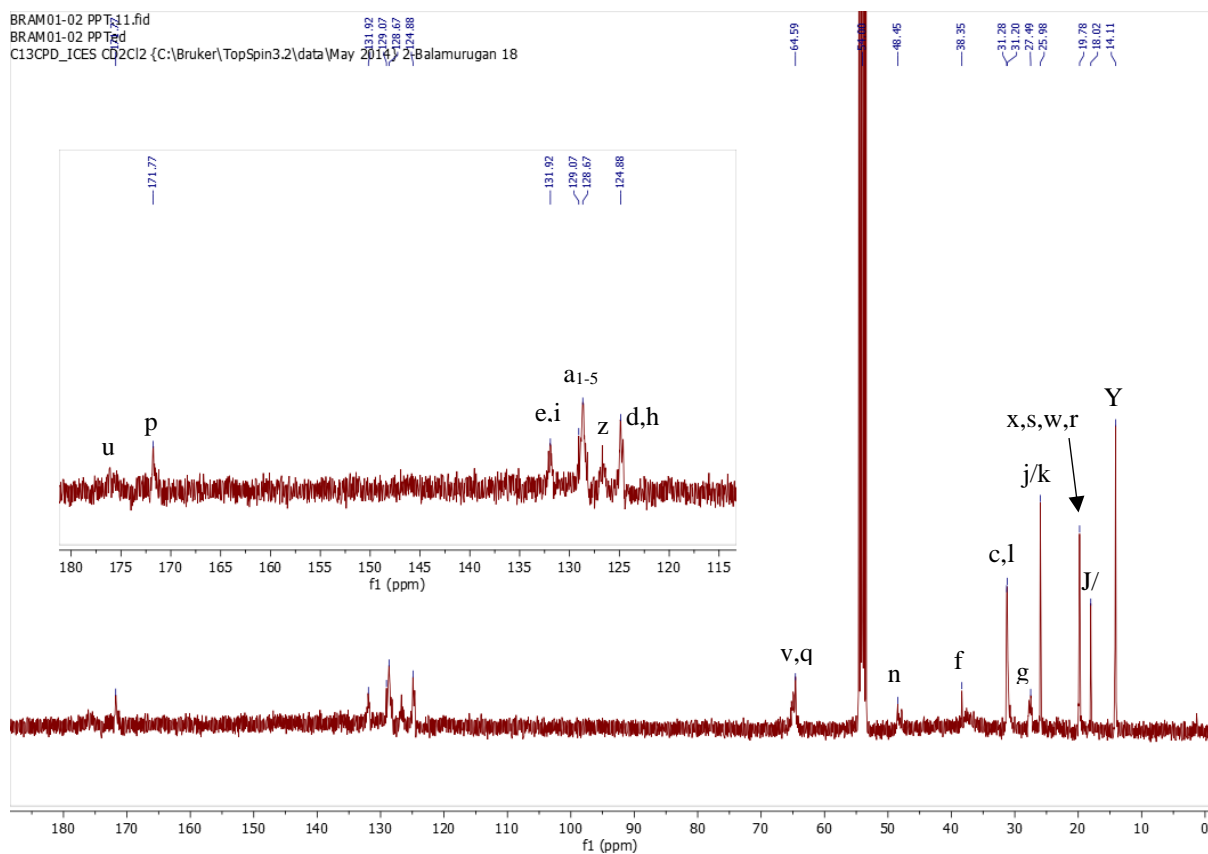

**Figure S2.**  $^{13}\text{C}$  NMR of spectrum of Styrene-Myrcene-DBI terpolymer synthesized from an equimolar feed ratio of all monomers. Peaks assigned based on HSQC spectrum and literature on data on myrcene/DBI copolymers.<sup>1</sup>



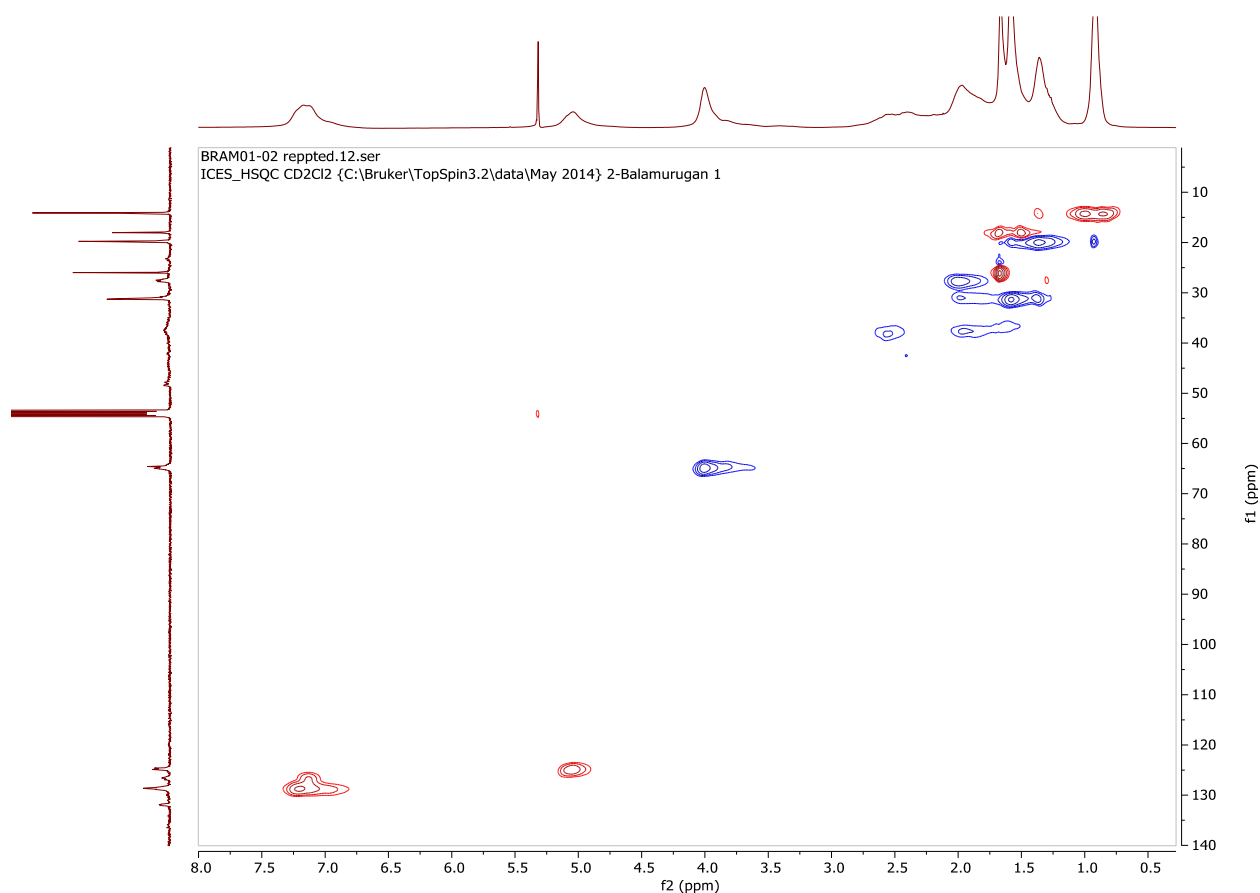

**Figure S3.** Heteronuclear Single Quantum Coherence (HSQC) spectrum Styrene-Myrcene-DBI terpolymer synthesized from an equimolar feed ratio of all monomers. Red shows proton-carbon cross peaks of CH and CH<sub>3</sub> groups. Blue shows proton-carbon cross peaks of CH<sub>2</sub> groups. The cross peaks in HSQC spectrum provide potential connection points in the terpolymer.

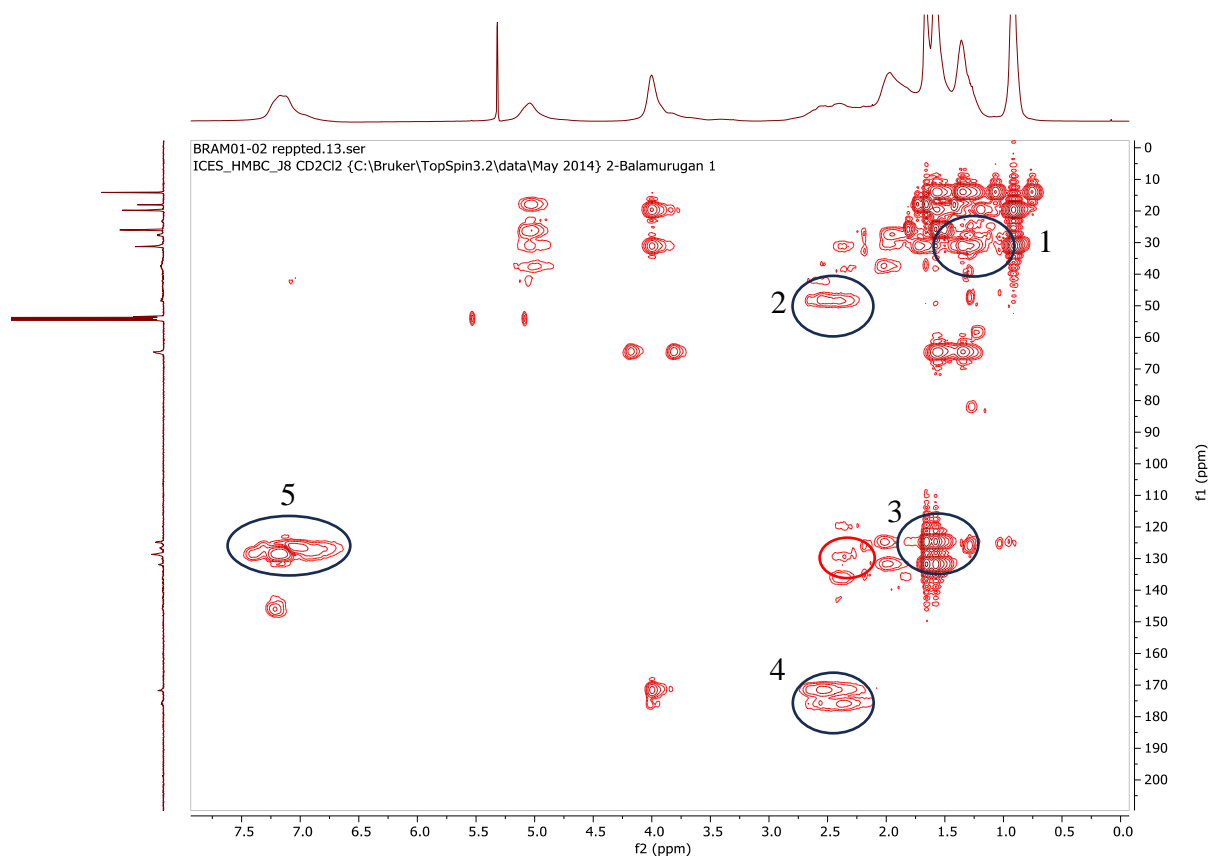

**Figure S4.** Heteronuclear Multiple Bond Correlation (HMBC) spectrum Styrene-Myrcene-DBI terpolymer synthesized from an equimolar feed ratio of all monomers.

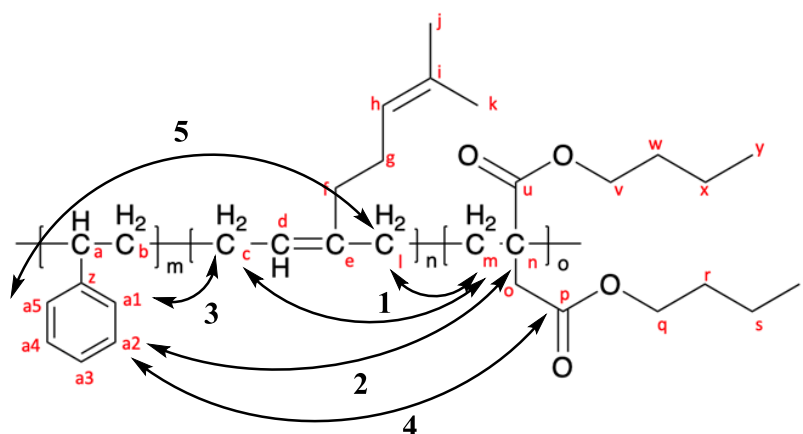

HMBC spectra provides the C-H correlation over 2 to 4 bonds depending upon the orientation of protons with respect to the carbon atom. This 2D NMR method helps to establish the connectivity of different monomer in the terpolymer system. The key correlations were identified and indicated in the Figure S4.

**Point 1:** Connection between myrcene proton 'c/l' and dibutyl itaconate carbon 'm'.

**Point 2:** Connection between styrene proton a and dibutyl itaconate carbon 'n'.

**Point 3:** Styrene aromatic ring carbon with myrcene proton 'c/l' connectivity and Styrene aromatic ring carbon with dibutyl itaconate carbon m connectivity.

**Point 4:** Connection between Styrene proton 'a' and dibutyl itaconate carbon 'u/p'.

**Point 5:** Connection between styrene aromatic protons and myrcene carbon 'l'.

All the above carbon-proton correlations confirms the formation of terpolymers and the propagation of monomers in the polymer chain.

## 2.5. GPC Studies of Terpolymer and Copolymers

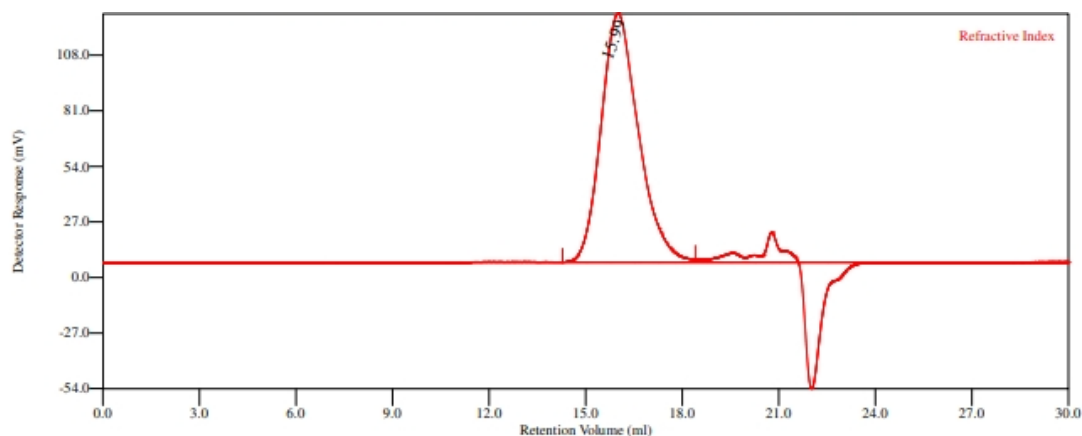

Conventional Calibration - Homopolymers : Results

|                   |        |
|-------------------|--------|
| Peak RV - (ml)    | 15.990 |
| Mn - (Daltons)    | 14,148 |
| Mw - (Daltons)    | 25,704 |
| Mz - (Daltons)    | 40,520 |
| Mp - (Daltons)    | 23,107 |
| Mw / Mn           | 1.817  |
| Percent Above Mw: | 0      |
| Percent Below Mw: | 0      |
| Mw 10.0% Low      | 4,795  |
| Mw 10.0% High     | 69,564 |
| Wt Fr (Peak)      | 1.000  |
| RI Area - (mVml)  | 163.27 |
| UV Area - (mVml)  | 0.00   |

|                          |                         |
|--------------------------|-------------------------|
| Annotation               |                         |
| Method File              | ps conv-0000.vcm        |
| Limits File              |                         |
| Date Acquired            | Apr 23, 2021 - 13:54:52 |
| Solvent                  | THF                     |
| Acquisition Operator     | admin : Administrator   |
| Calculation Operator     | admin : Administrator   |
| Column Set               | PL-gel 10um Mixed-B x2  |
| System                   | THF                     |
| Flow Rate - (ml/min)     | 1.000                   |
| Ini Volume - (ul)        | 100.0                   |
| Volume Increment - (ml)  | 0.00333                 |
| Detector Temp. - (deg C) | 40.0                    |
| Column Temp. - (deg C)   | 40.0                    |
| OmniSEC Build Number     | 406                     |

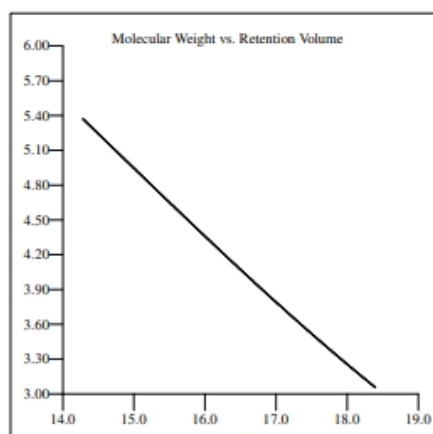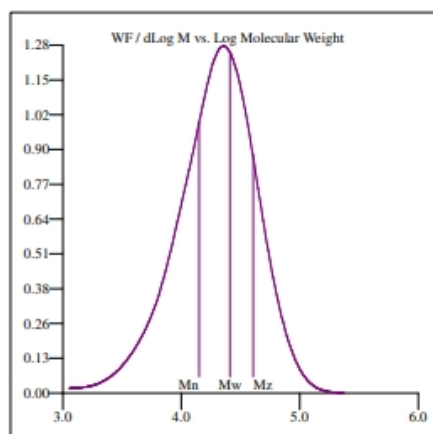

**Figure S5.** GPC trace and molecular weight statistics of Styrene-Myrcene-DBI terpolymer synthesized from an equimolar feed ratio of all monomers.

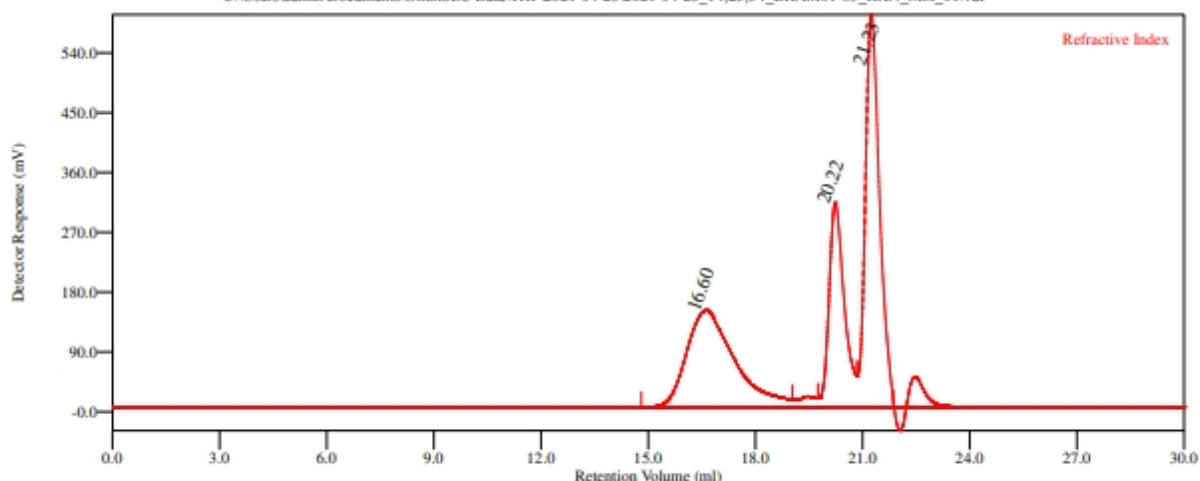

Conventional Calibration - Homopolymers : Results

|                   |        |         |         |
|-------------------|--------|---------|---------|
| Peak RV - (ml)    | 16.600 | 20.223  | 21.233  |
| Mn - (Daltons)    | 4,721  | 166     | 79      |
| Mw - (Daltons)    | 10,428 | 172     | 80      |
| Mz - (Daltons)    | 17,503 | 177     | 81      |
| Mp - (Daltons)    | 10,325 | 179     | 82      |
| Mw / Mn           | 2.209  | 1.033   | 1.015   |
| Percent Above Mw: | 0      | 100.000 | 100.000 |
| Percent Below Mw: | 0      | 0.000   | 0.000   |
| Mw 10.0% Low      | 1,309  | 121     | 63      |
| Mw 10.0% High     | 29,450 | 227     | 97      |
| Wt Fr (Peak)      | 0.346  | 0.234   | 0.419   |
| RI Area - (mVml)  | 225.36 | 152.67  | 273.06  |
| UV Area - (mVml)  | 0.00   | 0.00    | 0.00    |

|                          |                         |
|--------------------------|-------------------------|
| Annotation               |                         |
| Method File              | ps conv-0000.vcm        |
| Limits File              |                         |
| Date Acquired            | Apr 23, 2021 - 14:25:54 |
| Solvent                  | THF                     |
| Acquisition Operator     | admin : Administrator   |
| Calculation Operator     | admin : Administrator   |
| Column Set               | PL-gel 10um Mixed-B x2  |
| System                   | THF                     |
| Flow Rate - (ml/min)     | 1.000                   |
| Inj Volume - (ul)        | 100.0                   |
| Volume Increment - (ml)  | 0.00333                 |
| Detector Temp. - (deg C) | 40.0                    |
| Column Temp. - (deg C)   | 40.0                    |
| OmniSEC Build Number     | 406                     |

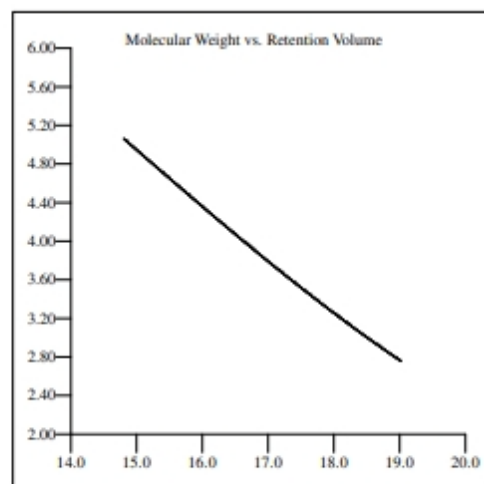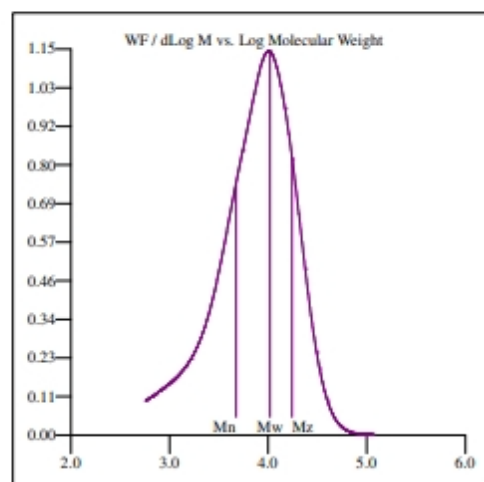

**Figure S6.** GPC trace and molecular weight statistics Styrene-Myrcene copolymer synthesized from an equimolar feed ratio of both monomers.

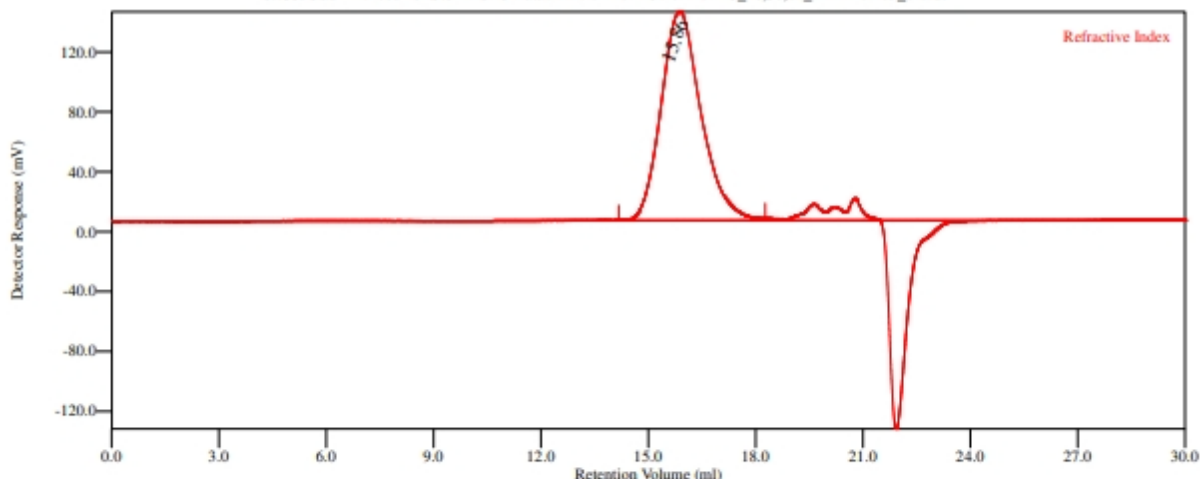

Conventional Calibration - Homopolymers : Results

|                   |           |
|-------------------|-----------|
| Peak RV - (ml)    | 15.860    |
| Mn - (Daltons)    | 17,598    |
| Mw - (Daltons)    | 30,853    |
| Mz - (Daltons)    | 47,396    |
| Mp - (Daltons)    | 27,571    |
| Mw / Mn           | 1.753     |
| Percent Above Mw: | 0 100.000 |
| Percent Below Mw: | 0 0.000   |
| Mw 10.0% Low      | 6.157     |
| Mw 10.0% High     | 81.603    |
| Wt Fr (Peak)      | 1.000     |
| RI Area - (mvml)  | 181.15    |
| UV Area - (mvml)  | 0.00      |

|                          |                         |
|--------------------------|-------------------------|
| Annotation               |                         |
| Method File              | ps conv-0000.vcm        |
| Limits File              |                         |
| Date Acquired            | Apr 23, 2021 - 16:30:01 |
| Solvent                  | THF                     |
| Acquisition Operator     | admin : Administrator   |
| Calculation Operator     | admin : Administrator   |
| Column Set               | PLgel 10um Mixed-B x2   |
| System                   | THF                     |
| Flow Rate - (ml/min)     | 1.000                   |
| Inj Volume - (ul)        | 100.0                   |
| Volume Increment - (ml)  | 0.00333                 |
| Detector Temp. - (deg C) | 40.0                    |
| Column Temp. - (deg C)   | 40.0                    |
| OmniSEC Build Number     | 406                     |

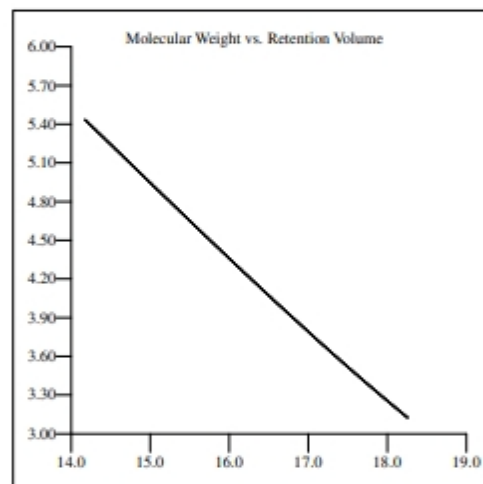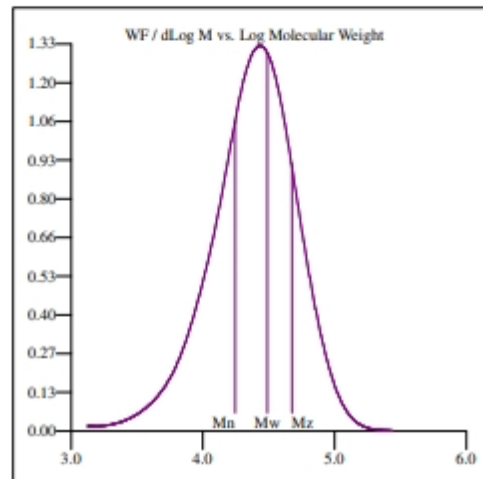

**Figure S7.** GPC trace and molecular weight statistics of Myrcene-DBI copolymer synthesized from an equimolar feed ratio of both monomers.

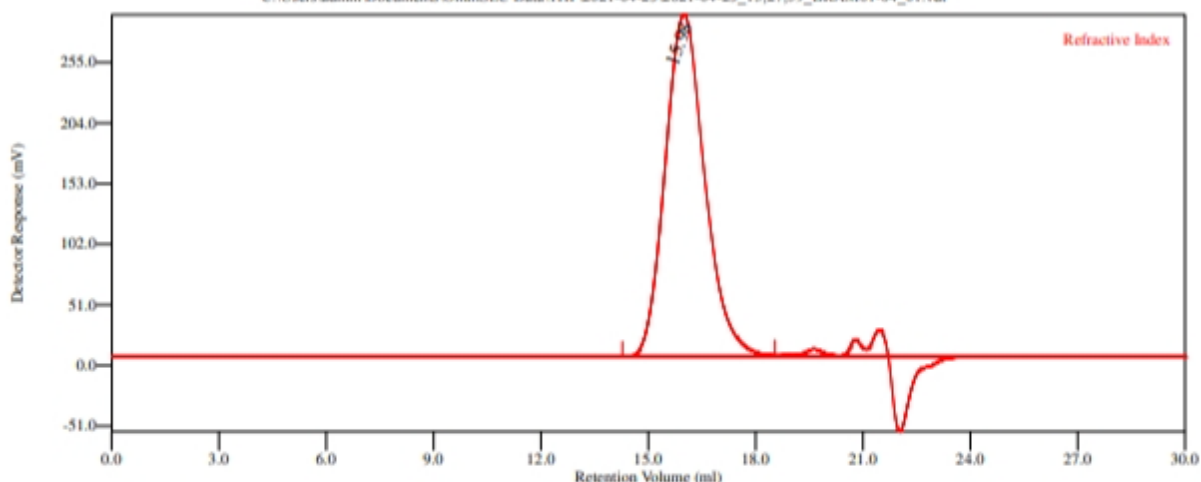

Conventional Calibration - Homopolymers : Results

|                   |           |
|-------------------|-----------|
| Peak RV - (ml)    | 15.983    |
| Mn - (Daltons)    | 15,582    |
| Mw - (Daltons)    | 26,597    |
| Mz - (Daltons)    | 40,076    |
| Mp - (Daltons)    | 23,312    |
| Mw / Mn           | 1.707     |
| Percent Above Mw: | 0 100.000 |
| Percent Below Mw: | 0 0.000   |
| Mw 10.0% Low      | 5,610     |
| Mw 10.0% High     | 69,155    |
| Wt Fr (Peak)      | 1.000     |
| RI Area - (mVml)  | 370.24    |
| UV Area - (mVml)  | 0.00      |

|                          |                         |
|--------------------------|-------------------------|
| Annotation               |                         |
| Method File              | ps conv-0000.vcm        |
| Limits File              |                         |
| Date Acquired            | Apr 23, 2021 - 15:27:59 |
| Solvent                  | THF                     |
| Acquisition Operator     | admin : Administrator   |
| Calculation Operator     | admin : Administrator   |
| Column Set               | PL-gel 10um Mixed-B x2  |
| System                   | THF                     |
| Flow Rate - (ml/min)     | 1.000                   |
| Inj Volume - (ul)        | 100.0                   |
| Volume Increment - (ml)  | 0.00333                 |
| Detector Temp. - (deg C) | 40.0                    |
| Column Temp. - (deg C)   | 40.0                    |
| OmniSEC Build Number     | 406                     |

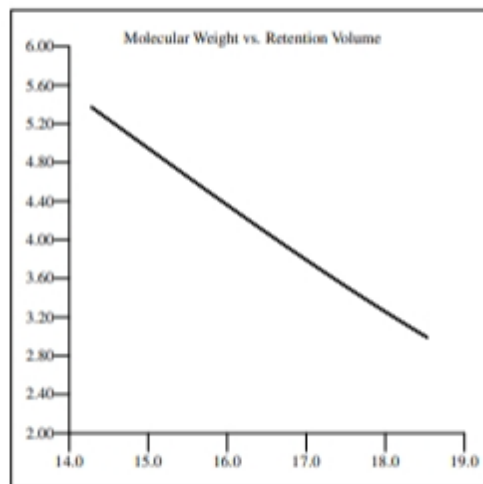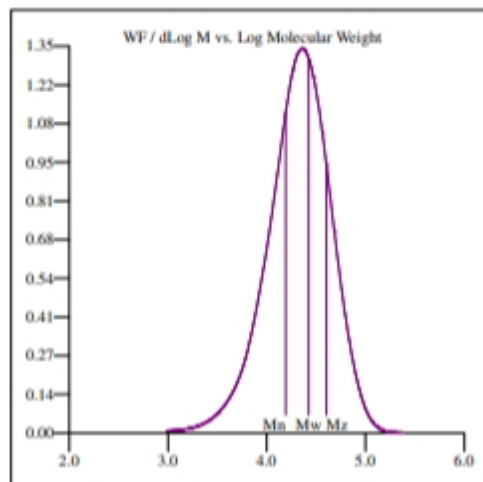

**Figure S8.** GPC trace and molecular weight statistics of Styrene-DBI copolymer synthesized from an equimolar feed ratio of both monomers.

## 2.6. DSC Study of Terpolymer and Copolymers

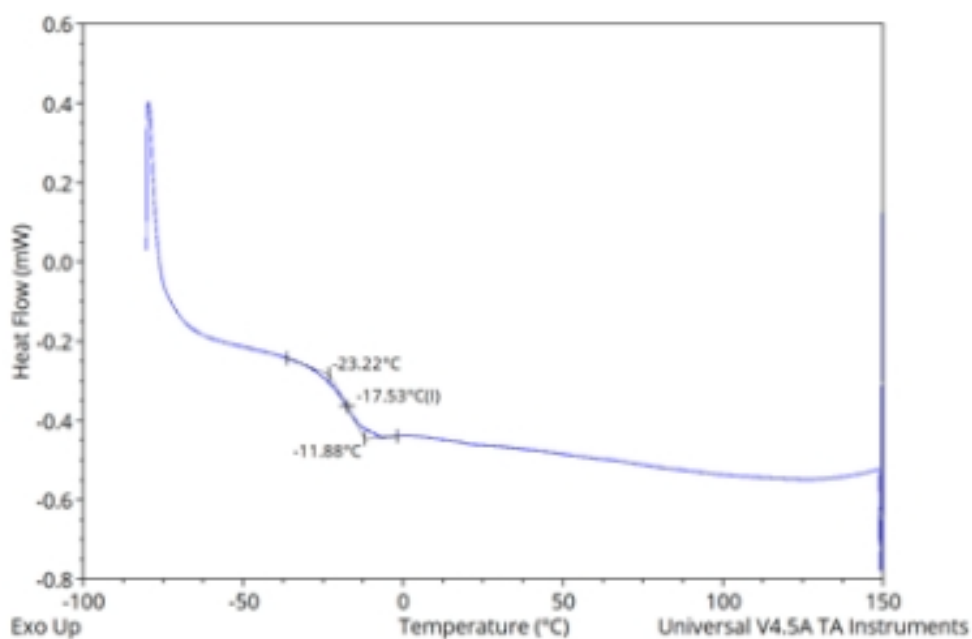

*Figure S9.* DSC trace of Styrene-Myrcene-DBI terpolymer synthesized from an equimolar feed ratio of all monomers.

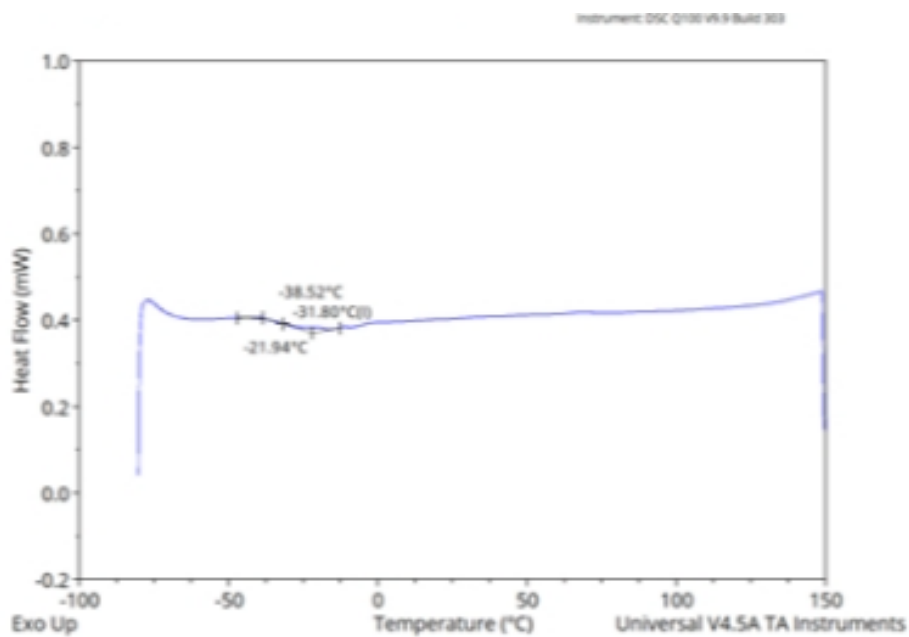

*Figure S10.* DSC trace of Myrcene-DBI copolymer synthesized from an equimolar feed ratio of both monomers.



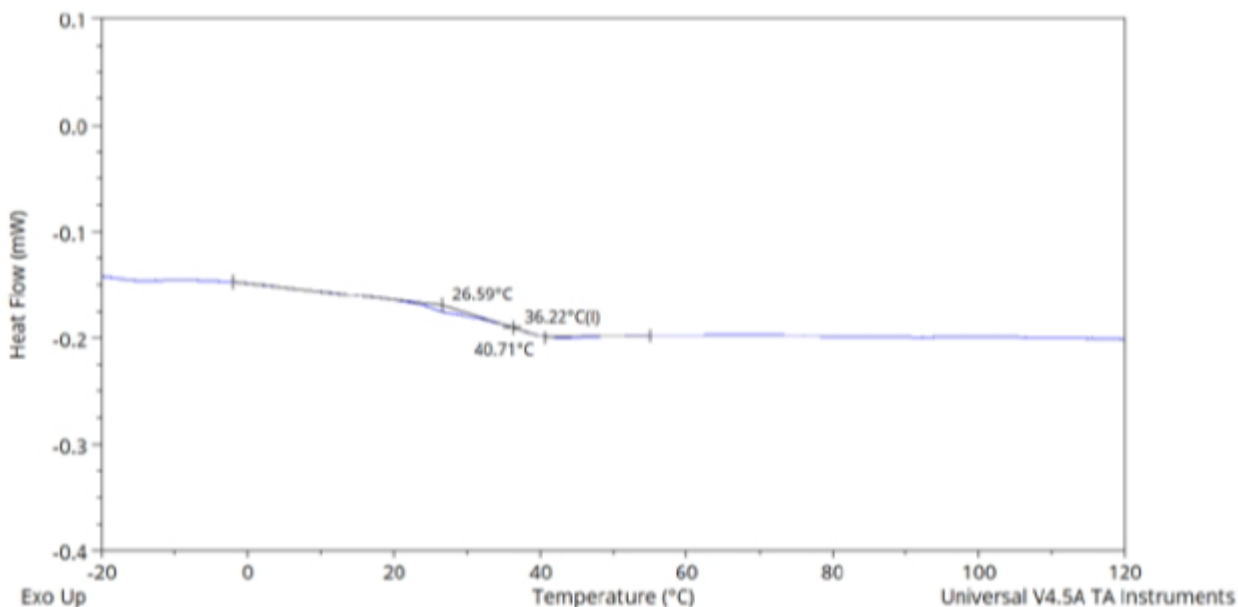

*Figure S11. DSC of trace styrene-DBI synthesized from an equimolar feed ratio of both monomers.*

### 3. Terpolymer Data

Section 3 of the SI collates all terpolymer data collected during the optimization phase of the study into tables for easy reference.

#### 3.1. Summary of all Initial Monomer Feed and Experimental Conditions

The following table summarizes the initial monomer feed as well as the experimental conditions for all 89 terpolymerization reactions:

| Sample | Styrene (mol %) | Myrcene (mol %) | DBI (mol %) | Temperature (deg C) | AIBN (mol %) | Time (min)  |
|--------|-----------------|-----------------|-------------|---------------------|--------------|-------------|
| TP1    | 42.73801586     | 20.02767454     | 37.2343096  | 78.20206641         | 1.747083294  | 464.7929061 |
| TP2    | 35.41030328     | 63.6148099      | 0.974886826 | 72.7083501          | 4.089130719  | 128.993385  |
| TP3    | 38.60700538     | 31.17194849     | 30.22104613 | 66.87686549         | 2.992601157  | 91.9906235  |
| TP4    | 70.54610542     | 21.69995774     | 7.753936842 | 71.4947115          | 0.604480811  | 147.9513405 |
| TP5    | 32.48398115     | 47.60626268     | 19.90975617 | 62.35325967         | 4.337931681  | 268.6935466 |
| TP6    | 2.182697747     | 47.83389803     | 49.98340422 | 60.88769149         | 0.19288254   | 227.4049233 |
| TP7    | 26.22740608     | 3.214398767     | 70.55819515 | 73.61556432         | 1.308429724  | 298.860031  |
| TP8    | 46.49326751     | 8.374224161     | 45.13250833 | 65.42451532         | 3.355735608  | 41.45221997 |
| TP9    | 27.88490174     | 56.71202248     | 15.40307578 | 69.48533947         | 0.953465846  | 351.2404299 |
| TP10   | 27.25628652     | 28.33509964     | 44.40861384 | 64.01912763         | 2.527522335  | 381.235779  |
| TP11   | 26.06063833     | 39.62502573     | 34.31433594 | 78.69318778         | 4.944339734  | 438.3929144 |
| TP12   | 7.098782633     | 50.40500367     | 42.4962137  | 75.71289142         | 2.373224705  | 198.2150931 |
| TP13   | 10.60184533     | 33.86874378     | 55.5294109  | 69.39126459         | 0.052966075  | 82.47584277 |
| TP15   | 35.8188977      | 10.30606915     | 53.87503315 | 69.78814675         | 4.931485061  | 126.9982419 |

|              |             |             |             |             |             |             |
|--------------|-------------|-------------|-------------|-------------|-------------|-------------|
| <b>TP16</b>  | 8.897586562 | 79.66920034 | 11.4332131  | 62.63016272 | 0.554273422 | 103.7671546 |
| <b>TP17</b>  | 11.47785769 | 34.96801287 | 53.55412944 | 69.19186878 | 0.183775705 | 96.18152409 |
| <b>TP18</b>  | 60.81574484 | 29.07018509 | 10.11407007 | 62.44137826 | 2.638214752 | 93.77736336 |
| <b>TP19</b>  | 46.2983347  | 25.28283109 | 28.41883421 | 66.11488454 | 1.397929295 | 130.014941  |
| <b>TP21</b>  | 11.47674418 | 34.96718482 | 53.556071   | 69.1921489  | 0.183633695 | 96.17398632 |
| <b>TP22</b>  | 25.45468545 | 38.28227249 | 36.26304206 | 65.94123052 | 1.801658837 | 168.9413281 |
| <b>TP23</b>  | 8.982768751 | 51.05871264 | 39.95851861 | 65.3124427  | 1.895371988 | 146.4087538 |
| <b>TP24</b>  | 29.06880553 | 53.62424803 | 17.30694644 | 73.41140816 | 1.579158518 | 459.0569256 |
| <b>TP8R</b>  | 46.49326751 | 8.374224161 | 45.13250833 | 65.42451532 | 3.355735608 | 41.45221997 |
| <b>TP36</b>  | 33.33333333 | 33.33333333 | 33.33333333 | 80          | 0.01        | 480         |
| <b>TP7R</b>  | 26.22740608 | 3.214398767 | 70.55819515 | 73.61556432 | 1.308429724 | 298.860031  |
| <b>TP8R2</b> | 46.49326751 | 8.374224161 | 45.13250833 | 65.42451532 | 3.355735608 | 41.45221997 |
| <b>TP19R</b> | 46.2983347  | 25.28283109 | 28.41883421 | 66.11488454 | 1.397929295 | 130.014941  |
| <b>TP37</b>  | 18.12316921 | 19.26501801 | 62.61181278 | 67.44276766 | 4.815959786 | 235.3127    |
| <b>TP38</b>  | 25.14868723 | 39.37080947 | 35.4805033  | 76.59507267 | 2.8102189   | 275.5266796 |
| <b>TP39</b>  | 10.86318351 | 17.70569035 | 71.43112615 | 79.85894956 | 4.180993366 | 61.41768945 |
| <b>TP40</b>  | 39.45242733 | 13.79182026 | 46.75575241 | 78.88989398 | 3.259604853 | 67.17073191 |
| <b>TP41</b>  | 53.26989082 | 37.90370204 | 8.826407144 | 63.31619902 | 2.443876164 | 468.9708083 |
| <b>TP42</b>  | 21.18401635 | 41.81146592 | 37.00451772 | 79.14344935 | 4.480730916 | 101.1794941 |
| <b>TP43</b>  | 45.92123815 | 15.96822134 | 38.11054052 | 64.99688625 | 0.17073896  | 420.9300958 |
| <b>TP44</b>  | 43.57105898 | 31.1980986  | 25.23084242 | 63.11794959 | 3.676245341 | 413.2140345 |
| <b>TP45</b>  | 16.44603056 | 51.07171976 | 32.48224969 | 74.02085358 | 1.338144354 | 309.9427094 |
| <b>TP46</b>  | 21.27810249 | 56.85350662 | 21.8683909  | 61.23197081 | 2.891953246 | 427.6562615 |
| <b>TP47</b>  | 24.10943711 | 33.56737234 | 42.32319055 | 71.55372437 | 4.36878218  | 124.1342939 |
| <b>TP48</b>  | 42.09829844 | 34.19577757 | 23.705924   | 79.78168452 | 3.246879501 | 253.7180608 |
| <b>TP49</b>  | 48.13747583 | 5.723735705 | 46.13878846 | 73.84444682 | 3.322489937 | 320.7434185 |
| <b>TP50</b>  | 15.13946797 | 67.42498117 | 17.43555086 | 68.20733514 | 4.72127865  | 284.7395267 |
| <b>TP51</b>  | 29.13833597 | 36.94205397 | 33.91961006 | 72.63426246 | 1.06295214  | 101.0330373 |
| <b>TP52</b>  | 10.85130644 | 82.24716741 | 6.90152615  | 74.66291416 | 1.177787323 | 381.3599159 |
| <b>TP53</b>  | 38.49997968 | 22.23280833 | 39.26721199 | 71.3788862  | 4.89668709  | 254.9074672 |
| <b>TP54</b>  | 76.77141637 | 6.938258409 | 16.29032522 | 78.63732886 | 4.924731168 | 476.7142603 |
| <b>TP55</b>  | 41.61300467 | 35.47299944 | 22.91399588 | 65.60943099 | 3.328266065 | 437.4132239 |
| <b>TP56</b>  | 66.29151461 | 29.48351928 | 4.224966109 | 63.29045104 | 0.568458684 | 306.5135858 |
| <b>TP57</b>  | 11.38441771 | 34.66858803 | 53.94699427 | 74.38026248 | 2.941242176 | 236.8223333 |
| <b>TP58</b>  | 45.56709951 | 15.19988425 | 39.23301625 | 74.88685403 | 4.280840078 | 278.2288157 |
| <b>TP59</b>  | 9.327477083 | 42.13040084 | 48.54212208 | 62.41298638 | 1.986792736 | 64.08790961 |
| <b>TP60</b>  | 12.8614924  | 16.52165833 | 70.61684927 | 67.34149171 | 0.916999484 | 239.2189879 |
| <b>TP61</b>  | 5           | 5           | 90          | 75          | 0.1         | 240         |
| <b>TP62</b>  | 25          | 5           | 70          | 75          | 0.1         | 240         |
| <b>TP15R</b> | 39.45242733 | 13.79182026 | 46.75575241 | 78.88989398 | 3.259604853 | 67.17073191 |
| <b>TP40R</b> | 35.8188977  | 10.30606915 | 53.87503315 | 69.78814675 | 4.931485061 | 126.9982419 |
| <b>TP63</b>  | 35          | 5           | 60          | 65          | 0.5         | 120         |
| <b>TP64</b>  | 15          | 5           | 80          | 70          | 1           | 150         |

|       |             |             |             |             |             |             |
|-------|-------------|-------------|-------------|-------------|-------------|-------------|
| TP65  | 45          | 10          | 45          | 75          | 1.5         | 180         |
| TP66  | 55          | 10          | 35          | 80          | 2           | 210         |
| TP67  | 65          | 15          | 20          | 80          | 0.5         | 210         |
| TP68  | 75          | 15          | 10          | 75          | 1           | 180         |
| TP69  | 85          | 10          | 5           | 70          | 1.5         | 150         |
| TP70  | 75          | 10          | 15          | 65          | 2           | 120         |
| TP71  | 5.817141484 | 23.1362894  | 76.04656911 | 73.90267832 | 0.197124157 | 126.705955  |
| TP72  | 12.83839619 | 12.39139086 | 79.77021295 | 61.93194153 | 1.326026083 | 451.484819  |
| TP73  | 10.65426715 | 46.19647251 | 48.14926034 | 61.1626867  | 4.990837835 | 471.5999767 |
| TP74  | 9.300917322 | 24.52262302 | 71.17645966 | 62.4424886  | 3.421079327 | 393.9568051 |
| TP75  | 5.62468005  | 15.43253995 | 83.94278    | 78.55379838 | 2.303679732 | 154.2801145 |
| TP76  | 6.349994515 | 35.91835297 | 62.73165252 | 66.29308401 | 3.835560643 | 321.844105  |
| TP77  | 5.944150323 | 37.10532729 | 61.95052238 | 62.77099773 | 4.046350235 | 255.2977864 |
| TP78  | 5.230837181 | 36.26025807 | 63.50890475 | 62.39960153 | 4.530969336 | 226.0671558 |
| TP79  | 5.003776938 | 43.98955644 | 56.00666662 | 70.45411795 | 2.549919195 | 477.0084104 |
| TP80  | 6.487648311 | 34.5316656  | 63.98068609 | 67.73694405 | 4.423989223 | 433.396232  |
| TP81  | 5.831153061 | 17.86471581 | 81.30413113 | 75.39229061 | 1.155122591 | 436.9574186 |
| TP82  | 13.44786123 | 5.446357864 | 86.1057809  | 74.74092945 | 0.199034634 | 316.8225859 |
| TP83  | 56.42840275 | 6.949994835 | 41.62160242 | 78.79616918 | 1.58940528  | 72.88348692 |
| TP84  | 71.54026422 | 5.152875867 | 28.30685991 | 76.74227383 | 3.284804993 | 118.9623407 |
| TP85  | 75.42799063 | 5.413338045 | 24.15867132 | 66.48887699 | 2.242041561 | 128.3132982 |
| TP86  | 57.90887713 | 6.361677752 | 40.72944512 | 76.66119302 | 3.627537844 | 148.7356632 |
| TP87  | 78.47067379 | 5.778520622 | 20.75080558 | 64.46776135 | 1.028713885 | 161.550922  |
| TP88  | 66.35836766 | 8.368602335 | 30.27303001 | 64.02569858 | 0.839720853 | 221.0160857 |
| TP89  | 26.24842565 | 7.377925195 | 71.37364915 | 79.93979141 | 4.394749329 | 313.2887613 |
| TP90  | 42.27469457 | 9.140924935 | 53.58438049 | 60.37135404 | 1.18009823  | 458.1411079 |
| TP91  | 8.158884051 | 48.64524014 | 48.19587581 | 79.75569913 | 0.727789595 | 73.30421844 |
| TP92  | 10.85451018 | 14.82696653 | 79.31852329 | 78.0952397  | 2.343185423 | 461.632338  |
| TP93  | 33.14663048 | 5.111834884 | 66.74153463 | 70.62249478 | 0.090641677 | 190.4096881 |
| TP94  | 30.23066151 | 6.35008313  | 68.41925536 | 61.59787608 | 0.698512969 | 406.7679498 |
| TP49R | 48.13747583 | 5.723735705 | 46.13878846 | 73.84444682 | 3.322489937 | 320.7434185 |
| TP58R | 45.56709951 | 15.19988425 | 39.23301625 | 74.88685403 | 4.280840078 | 278.2288157 |

*Table S3. Summary of all Initial Monomer Feed and Experimental Conditions. Summary of all initial monomer feed ratios, reaction temperature, amount of AIBN and reaction time. R stands for a repeat of the experiment of a given condition.*

### **3.2. Summary of <sup>1</sup>H Integration Values for Reaction Mixture Prior to Reaction**

The following table summarizes the initial <sup>1</sup>H integration values for each monomer as well as the overall <sup>1</sup>H integration values for all 89 terpolymerization reactions before the reaction starts:

| Sample | 0 min Myrcene Integration | 0 min DBI Integration | 0 min Styrene Integration | 0 min Overall Integration |
|--------|---------------------------|-----------------------|---------------------------|---------------------------|
|--------|---------------------------|-----------------------|---------------------------|---------------------------|

|              |       |       |       |       |
|--------------|-------|-------|-------|-------|
| <b>TP1</b>   | 0.557 | 1.133 | 1.17  | 2.86  |
| <b>TP2</b>   | 1.687 | 0.027 | 1.033 | 2.747 |
| <b>TP3</b>   | 0.833 | 0.936 | 1.173 | 2.942 |
| <b>TP4</b>   | 0.606 | 0.271 | 2.109 | 2.986 |
| <b>TP5</b>   | 1.342 | 0.719 | 0.977 | 3.038 |
| <b>TP6</b>   | 1.404 | 1.643 | 0.065 | 3.112 |
| <b>TP7</b>   | 0.12  | 2.212 | 0.772 | 3.104 |
| <b>TP8</b>   | 0.225 | 1.388 | 1.356 | 2.969 |
| <b>TP9</b>   | 1.59  | 0.539 | 0.826 | 2.955 |
| <b>TP10</b>  | 0.815 | 1.47  | 0.647 | 2.932 |
| <b>TP11</b>  | 1.066 | 1.083 | 0.554 | 2.703 |
| <b>TP12</b>  | 1.401 | 1.396 | 0.224 | 3.021 |
| <b>TP13</b>  | 0.896 | 1.631 | 0.319 | 2.846 |
| <b>TP15</b>  | 0.314 | 1.668 | 1.061 | 3.043 |
| <b>TP16</b>  | 2.174 | 0.435 | 0.314 | 2.923 |
| <b>TP17</b>  | 0.974 | 1.712 | 0.402 | 3.088 |
| <b>TP18</b>  | 0.79  | 0.323 | 1.84  | 2.953 |
| <b>TP19</b>  | 0.727 | 0.977 | 1.497 | 3.201 |
| <b>TP21</b>  | 1.018 | 1.748 | 0.38  | 3.146 |
| <b>TP22</b>  | 1.14  | 1.239 | 0.774 | 3.153 |
| <b>TP23</b>  | 1.406 | 1.28  | 0.274 | 2.96  |
| <b>TP24</b>  | 1.459 | 0.552 | 0.841 | 2.852 |
| <b>TP8R</b>  | 0.218 | 1.303 | 1.31  | 2.831 |
| <b>TP36</b>  | 0.94  | 1.064 | 0.996 | 3     |
| <b>TP7R</b>  | 0.109 | 2.255 | 0.793 | 3.157 |
| <b>TP8R2</b> | 0.231 | 1.402 | 1.37  | 3.003 |
| <b>TP19R</b> | 0.704 | 0.942 | 1.459 | 3.105 |
| <b>TP37</b>  | 0.605 | 2.011 | 0.516 | 3.132 |
| <b>TP38</b>  | 1.15  | 1.157 | 0.742 | 3.049 |
| <b>TP39</b>  | 0.505 | 2.32  | 0.338 | 3.163 |
| <b>TP40</b>  | 0.384 | 1.495 | 1.201 | 3.08  |
| <b>TP41</b>  | 1.105 | 0.312 | 1.757 | 3.174 |
| <b>TP42</b>  | 1.187 | 1.26  | 0.711 | 3.158 |
| <b>TP43</b>  | 0.487 | 1.269 | 1.478 | 3.234 |
| <b>TP44</b>  | 0.925 | 0.863 | 1.449 | 3.237 |
| <b>TP45</b>  | 1.551 | 1.112 | 0.502 | 3.165 |
| <b>TP46</b>  | 1.409 | 0.614 | 0.603 | 2.626 |
| <b>TP47</b>  | 0.876 | 1.29  | 0.722 | 2.888 |
| <b>TP48</b>  | 0.902 | 0.699 | 1.146 | 2.747 |
| <b>TP49</b>  | 0.149 | 1.421 | 1.424 | 2.994 |
| <b>TP50</b>  | 1.907 | 0.615 | 0.463 | 2.985 |
| <b>TP51</b>  | 1.012 | 1.066 | 0.871 | 2.949 |
| <b>TP52</b>  | 2.355 | 0.284 | 0.332 | 2.971 |

|              |       |       |       |       |
|--------------|-------|-------|-------|-------|
| <b>TP53</b>  | 0.659 | 1.235 | 1.115 | 3.009 |
| <b>TP54</b>  | 0.165 | 0.506 | 2.275 | 2.946 |
| <b>TP55</b>  | 0.889 | 0.683 | 1.131 | 2.703 |
| <b>TP56</b>  | 0.838 | 0.146 | 2.042 | 3.026 |
| <b>TP57</b>  | 0.999 | 1.83  | 0.408 | 3.237 |
| <b>TP58</b>  | 0.484 | 1.301 | 1.397 | 3.182 |
| <b>TP59</b>  | 1.154 | 1.519 | 0.276 | 2.949 |
| <b>TP60</b>  | 0.476 | 2.081 | 0.379 | 2.936 |
| <b>TP61</b>  | 0.142 | 2.722 | 0.156 | 3.02  |
| <b>TP62</b>  | 0.138 | 2.054 | 0.707 | 2.899 |
| <b>TP15R</b> | 0.281 | 1.659 | 1.039 | 2.979 |
| <b>TP40R</b> | 0.369 | 1.483 | 1.17  | 3.022 |
| <b>TP63</b>  | 0.142 | 1.941 | 1.074 | 3.157 |
| <b>TP64</b>  | 0.159 | 2.654 | 0.481 | 3.294 |
| <b>TP65</b>  | 0.255 | 1.45  | 1.353 | 3.058 |
| <b>TP66</b>  | 0.245 | 1.087 | 1.618 | 2.95  |
| <b>TP67</b>  | 0.414 | 0.628 | 2.03  | 3.072 |
| <b>TP68</b>  | 0.401 | 0.306 | 2.291 | 2.998 |
| <b>TP69</b>  | 0.277 | 0.157 | 2.759 | 3.193 |
| <b>TP70</b>  | 0.351 | 0.604 | 3.098 | 4.053 |
| <b>TP71</b>  | 0.696 | 2.449 | 0.186 | 3.331 |
| <b>TP72</b>  | 0.349 | 2.487 | 0.385 | 3.221 |
| <b>TP73</b>  | 1.238 | 1.537 | 0.297 | 3.072 |
| <b>TP74</b>  | 0.711 | 2.154 | 0.27  | 3.135 |
| <b>TP75</b>  | 0.467 | 2.681 | 0.172 | 3.32  |
| <b>TP76</b>  | 1.014 | 2.08  | 0.174 | 3.268 |
| <b>TP77</b>  | 1.012 | 2.068 | 0.167 | 3.247 |
| <b>TP78</b>  | 1.064 | 1.99  | 0.168 | 3.222 |
| <b>TP79</b>  | 1.231 | 1.827 | 0.122 | 3.18  |
| <b>TP80</b>  | 0.905 | 1.983 | 0.168 | 3.056 |
| <b>TP81</b>  | 0.473 | 2.545 | 0.165 | 3.183 |
| <b>TP82</b>  | 0.167 | 2.728 | 0.386 | 3.281 |
| <b>TP83</b>  | 0.158 | 1.288 | 1.635 | 3.081 |
| <b>TP84</b>  | 0.107 | 0.897 | 2.133 | 3.137 |
| <b>TP85</b>  | 0.136 | 0.735 | 2.29  | 3.161 |
| <b>TP86</b>  | 0.161 | 1.23  | 1.734 | 3.125 |
| <b>TP87</b>  | 0.135 | 0.612 | 2.281 | 3.028 |
| <b>TP88</b>  | 0.214 | 0.953 | 1.924 | 3.091 |
| <b>TP89</b>  | 0.279 | 3.422 | 1.143 | 4.844 |
| <b>TP90</b>  | 0.223 | 1.674 | 1.225 | 3.122 |
| <b>TP91</b>  | 1.274 | 1.498 | 0.272 | 3.044 |
| <b>TP92</b>  | 0.427 | 2.429 | 0.309 | 3.165 |
| <b>TP93</b>  | 0.176 | 3.058 | 1.433 | 4.667 |

|              |       |       |       |       |
|--------------|-------|-------|-------|-------|
| <b>TP94</b>  | 0.175 | 2.214 | 0.88  | 3.269 |
| <b>TP49R</b> | 0.139 | 1.451 | 1.414 | 3.004 |
| <b>TP58R</b> | 0.404 | 1.207 | 1.334 | 2.945 |

**Table S4. Summary of <sup>1</sup>H Integration Values for Reaction Mixture Prior to Reaction.** Summary of all initial monomer and overall <sup>1</sup>H integration values before the reaction starts. R stands for a repeat of the experiment of a given condition.

### **3.3. Summary of <sup>1</sup>H Integration Values for Reaction Mixture After Reaction Prior to Precipitation**

The following table summarizes the initial <sup>1</sup>H integration values for each monomer as well as the overall <sup>1</sup>H integration values for all 89 terpolymerization reactions after reaction reaction time has elapsed and prior to precipitation in MeOH:

| <b>Sample</b> | <b>Pre-Precipitation Myrcene Integration</b> | <b>Pre-Precipitation DBI Integration</b> | <b>Pre-Precipitation Styrene Integration</b> | <b>Pre-Precipitation Overall Integration</b> |
|---------------|----------------------------------------------|------------------------------------------|----------------------------------------------|----------------------------------------------|
| <b>TP1</b>    | 0.005                                        | 0.231                                    | 0.32                                         | 0.556                                        |
| <b>TP2</b>    | 1.304                                        | 0.013                                    | 0.898                                        | 2.215                                        |
| <b>TP3</b>    | 0.673                                        | 0.817                                    | 1.04                                         | 2.53                                         |
| <b>TP4</b>    | 0.5                                          | 0.222                                    | 1.905                                        | 2.627                                        |
| <b>TP5</b>    | 0.932                                        | 0.539                                    | 0.855                                        | 2.326                                        |
| <b>TP6</b>    | 1.297                                        | 1.576                                    | 0.038                                        | 2.911                                        |
| <b>TP7</b>    | 0                                            | 1.046                                    | 0.079                                        | 1.125                                        |
| <b>TP8</b>    | 0.176                                        | 1.299                                    | 1.23                                         | 2.705                                        |
| <b>TP9</b>    | 1.134                                        | 0.334                                    | 0.686                                        | 2.154                                        |
| <b>TP10</b>   | 0.346                                        | 0.896                                    | 0.423                                        | 1.665                                        |
| <b>TP11</b>   | 0.051                                        | 0.125                                    | 0.155                                        | 0.331                                        |
| <b>TP12</b>   | 0.727                                        | 0.812                                    | 0.164                                        | 1.703                                        |
| <b>TP13</b>   | 0.799                                        | 1.504                                    | 0.29                                         | 2.593                                        |
| <b>TP15</b>   | 0.078                                        | 0.928                                    | 0.485                                        | 1.491                                        |
| <b>TP16</b>   | 2.126                                        | 0.424                                    | 0.302                                        | 2.852                                        |
| <b>TP17</b>   | 0.866                                        | 1.646                                    | 0.366                                        | 2.878                                        |
| <b>TP18</b>   | 0.697                                        | 0.281                                    | 1.73                                         | 2.708                                        |
| <b>TP19</b>   | 0.556                                        | 0.787                                    | 1.309                                        | 2.652                                        |
| <b>TP21</b>   | 0.928                                        | 1.682                                    | 0.36                                         | 2.97                                         |
| <b>TP22</b>   | 0.873                                        | 1.019                                    | 0.667                                        | 2.559                                        |
| <b>TP23</b>   | 1.124                                        | 1.048                                    | 0.229                                        | 2.401                                        |
| <b>TP24</b>   | 0.647                                        | 0.172                                    | 0.558                                        | 1.377                                        |
| <b>TP8R</b>   | 0.169                                        | 1.196                                    | 1.167                                        | 2.532                                        |
| <b>TP36</b>   | 0.778                                        | 0.939                                    | 0.937                                        | 2.654                                        |
| <b>TP7R</b>   | 0                                            | 1.078                                    | 0.143                                        | 1.221                                        |
| <b>TP8R2</b>  | 0.176                                        | 1.31                                     | 1.237                                        | 2.723                                        |
| <b>TP19R</b>  | 0.549                                        | 0.807                                    | 1.289                                        | 2.645                                        |

|              |       |       |       |       |
|--------------|-------|-------|-------|-------|
| <b>TP37</b>  | 0.151 | 1.199 | 0.253 | 1.603 |
| <b>TP38</b>  | 0.252 | 0.352 | 0.364 | 0.968 |
| <b>TP39</b>  | 0.144 | 1.582 | 0.177 | 1.903 |
| <b>TP40</b>  | 0.134 | 0.848 | 0.693 | 1.675 |
| <b>TP41</b>  | 0.638 | 0.137 | 1.327 | 2.102 |
| <b>TP42</b>  | 0.379 | 0.556 | 0.402 | 1.337 |
| <b>TP43</b>  | 0.339 | 1.051 | 1.234 | 2.624 |
| <b>TP44</b>  | 0.407 | 0.411 | 0.97  | 1.788 |
| <b>TP45</b>  | 0.774 | 0.571 | 0.348 | 1.693 |
| <b>TP46</b>  | 1.031 | 0.418 | 0.506 | 1.955 |
| <b>TP47</b>  | 0.417 | 0.826 | 0.49  | 1.733 |
| <b>TP48</b>  | 0.126 | 0.106 | 0.461 | 0.693 |
| <b>TP49</b>  | 0     | 0.217 | 0.132 | 0.349 |
| <b>TP50</b>  | 1.147 | 0.304 | 0.341 | 1.792 |
| <b>TP51</b>  | 0.734 | 0.822 | 0.717 | 2.273 |
| <b>TP52</b>  | 1.664 | 0.141 | 0.276 | 2.081 |
| <b>TP53</b>  | 0.104 | 0.436 | 0.493 | 1.033 |
| <b>TP54</b>  | 0     | 0     | 0.056 | 0.056 |
| <b>TP55</b>  | 0.336 | 0.26  | 0.709 | 1.305 |
| <b>TP56</b>  | 0.669 | 0.101 | 1.784 | 2.554 |
| <b>TP57</b>  | 0.232 | 0.894 | 0.176 | 1.302 |
| <b>TP58</b>  | 0.003 | 0.211 | 0.225 | 0.439 |
| <b>TP59</b>  | 1.044 | 1.397 | 0.251 | 2.692 |
| <b>TP60</b>  | 0.268 | 1.732 | 0.268 | 2.268 |
| <b>TP61</b>  | 0.023 | 2.414 | 0.07  | 2.507 |
| <b>TP62</b>  | 0.058 | 1.864 | 0.528 | 2.45  |
| <b>TP15R</b> | 0.141 | 0.925 | 0.592 | 1.658 |
| <b>TP40R</b> | 0.119 | 0.764 | 0.616 | 1.499 |
| <b>TP63</b>  | 0.079 | 1.855 | 0.925 | 2.859 |
| <b>TP64</b>  | 0.055 | 2.078 | 0.229 | 2.362 |
| <b>TP65</b>  | 0.033 | 0.731 | 0.597 | 1.361 |
| <b>TP66</b>  | 0.012 | 0.238 | 0.438 | 0.688 |
| <b>TP67</b>  | 0.161 | 0.295 | 1.259 | 1.715 |
| <b>TP68</b>  | 0.219 | 0.143 | 1.57  | 1.932 |
| <b>TP69</b>  | 0.205 | 0.083 | 1.961 | 2.249 |
| <b>TP70</b>  | 0.26  | 0.455 | 2.537 | 3.252 |
| <b>TP71</b>  | 0.475 | 2.28  | 0.154 | 2.909 |
| <b>TP72</b>  | 0.149 | 1.891 | 0.191 | 2.231 |
| <b>TP73</b>  | 0.532 | 0.897 | 0.174 | 1.603 |
| <b>TP74</b>  | 0.182 | 1.419 | 0.115 | 1.716 |
| <b>TP75</b>  | 0.079 | 1.709 | 0.069 | 1.857 |
| <b>TP76</b>  | 0.365 | 1.214 | 0.095 | 1.674 |
| <b>TP77</b>  | 0.534 | 1.443 | 0.113 | 2.09  |

|       |       |       |       |       |
|-------|-------|-------|-------|-------|
| TP78  | 0.594 | 1.582 | 0.115 | 2.291 |
| TP79  | 0.242 | 0.787 | 0.027 | 1.056 |
| TP80  | 0.105 | 0.963 | 0.043 | 1.111 |
| TP81  | 0.031 | 1.417 | 0.03  | 1.478 |
| TP82  | 0     | 2.302 | 0.202 | 2.504 |
| TP83  | 0     | 0.856 | 1.02  | 1.876 |
| TP84  | 0     | 0.217 | 0.648 | 0.865 |
| TP85  | 0     | 0.492 | 1.588 | 2.08  |
| TP86  | 0     | 0.357 | 0.446 | 0.803 |
| TP87  | 0     | 0.343 | 1.538 | 1.881 |
| TP88  | 0.125 | 0.732 | 1.535 | 2.392 |
| TP89  | 0     | 0.811 | 0     | 0.811 |
| TP90  | 0.057 | 1.132 | 0.728 | 1.917 |
| TP91  | 0.943 | 1.293 | 0.229 | 2.465 |
| TP92  | 0     | 0.871 | 0     | 0.871 |
| TP93  | 0.154 | 2.657 | 1.083 | 3.894 |
| TP94  | 0     | 1.391 | 0.33  | 1.721 |
| TP49R | 0     | 0.317 | 0.173 | 0.49  |
| TP58R | 0     | 0.162 | 0.242 | 0.404 |

**Table S5. Summary of  $^1\text{H}$  Integration Values for Reaction Mixture After Reaction Prior to Precipitation.** Summary of all initial monomer and overall  $^1\text{H}$  integration values after the reaction time has elapsed, prior to precipitation in MeOH. R stands for a repeat of the experiment of a given condition.

### 3.4. Summary of Monomer Conversion Values for All Samples

The following table summarizes the monomer conversion values for each monomer as well as the overall conversion for all 89 terpolymerization reactions:

| Sample | Myrcene Conversion (%) | DBI Conversion (%) | Styrene Conversion (%) | Overall Conversion (%) |
|--------|------------------------|--------------------|------------------------|------------------------|
| TP1    | 99.10233393            | 79.61165049        | 72.64957265            | 80.55944056            |
| TP2    | 22.70302312            | 51.85185185        | 13.06873185            | 19.36658173            |
| TP3    | 19.20768307            | 12.71367521        | 11.33844842            | 14.00407886            |
| TP4    | 17.49174917            | 18.08118081        | 9.672830725            | 12.02277294            |
| TP5    | 30.5514158             | 25.03477051        | 12.48720573            | 23.43647136            |
| TP6    | 7.621082621            | 4.077906269        | 41.53846154            | 6.458868895            |
| TP7    | 100                    | 52.7124774         | 89.76683938            | 63.7564433             |
| TP8    | 21.77777778            | 6.412103746        | 9.292035398            | 8.891882789            |
| TP9    | 28.67924528            | 38.03339518        | 16.94915254            | 27.10659898            |
| TP10   | 57.54601227            | 39.04761905        | 34.62132921            | 43.21282401            |
| TP11   | 95.21575985            | 88.45798707        | 72.02166065            | 87.75434702            |
| TP12   | 48.10849393            | 41.83381089        | 26.78571429            | 43.62793777            |
| TP13   | 10.82589286            | 7.786633967        | 9.090909091            | 8.889669712            |



|              |             |             |             |             |
|--------------|-------------|-------------|-------------|-------------|
| <b>TP15</b>  | 75.15923567 | 44.36450839 | 54.28840716 | 51.00230036 |
| <b>TP16</b>  | 2.207911684 | 2.528735632 | 3.821656051 | 2.42901129  |
| <b>TP17</b>  | 11.08829569 | 3.855140187 | 8.955223881 | 6.800518135 |
| <b>TP18</b>  | 11.7721519  | 13.00309598 | 5.97826087  | 8.296647477 |
| <b>TP19</b>  | 23.5213205  | 19.44728762 | 12.55845023 | 17.15089035 |
| <b>TP21</b>  | 8.84086444  | 3.775743707 | 5.263157895 | 5.594405594 |
| <b>TP22</b>  | 23.42105263 | 17.75625504 | 13.82428941 | 18.83920076 |
| <b>TP23</b>  | 20.056899   | 18.125      | 16.42335766 | 18.88513514 |
| <b>TP24</b>  | 55.65455792 | 68.84057971 | 33.65041617 | 51.71809257 |
| <b>TP8R</b>  | 22.47706422 | 8.21181888  | 10.91603053 | 10.561639   |
| <b>TP36</b>  | 17.23404255 | 11.7481203  | 5.923694779 | 11.53333333 |
| <b>TP7R</b>  | 100         | 52.19512195 | 81.96721311 | 61.32404181 |
| <b>TP8R2</b> | 23.80952381 | 6.562054208 | 9.708029197 | 9.324009324 |
| <b>TP19R</b> | 22.01704545 | 14.33121019 | 11.65181631 | 14.81481481 |
| <b>TP37</b>  | 75.04132231 | 40.37792143 | 50.96899225 | 48.81864623 |
| <b>TP38</b>  | 78.08695652 | 69.57649092 | 50.94339623 | 68.25188586 |
| <b>TP39</b>  | 71.48514851 | 31.81034483 | 47.63313609 | 39.83559911 |
| <b>TP40</b>  | 65.10416667 | 43.27759197 | 42.29808493 | 45.61688312 |
| <b>TP41</b>  | 42.26244344 | 56.08974359 | 24.47353443 | 33.77441714 |
| <b>TP42</b>  | 68.07076664 | 55.87301587 | 43.45991561 | 57.6630779  |
| <b>TP43</b>  | 30.39014374 | 17.17888101 | 16.50879567 | 18.86209029 |
| <b>TP44</b>  | 56          | 52.37543453 | 33.05728088 | 44.76367006 |
| <b>TP45</b>  | 50.0967118  | 48.65107914 | 30.67729084 | 46.50868878 |
| <b>TP46</b>  | 26.82753726 | 31.9218241  | 16.08623549 | 25.5521706  |
| <b>TP47</b>  | 52.39726027 | 35.96899225 | 32.13296399 | 39.99307479 |
| <b>TP48</b>  | 86.03104213 | 84.83547926 | 59.77312391 | 74.77247907 |
| <b>TP49</b>  | 100         | 84.72906404 | 90.73033708 | 88.34335337 |
| <b>TP50</b>  | 39.85317252 | 50.56910569 | 26.34989201 | 39.96649916 |
| <b>TP51</b>  | 27.47035573 | 22.88930582 | 17.68082664 | 22.92302475 |
| <b>TP52</b>  | 29.3418259  | 50.35211268 | 16.86746988 | 29.95624369 |
| <b>TP53</b>  | 84.2185129  | 64.69635628 | 55.78475336 | 65.66965769 |
| <b>TP54</b>  | 100         | 100         | 97.53846154 | 98.09911745 |
| <b>TP55</b>  | 62.20472441 | 61.93265007 | 37.31211317 | 51.72031077 |
| <b>TP56</b>  | 20.16706444 | 30.82191781 | 12.63467189 | 15.59814937 |
| <b>TP57</b>  | 76.77677678 | 51.14754098 | 56.8627451  | 59.77757183 |
| <b>TP58</b>  | 99.38016529 | 83.78170638 | 83.8940587  | 86.20364551 |
| <b>TP59</b>  | 9.532062392 | 8.031599737 | 9.057971014 | 8.714818583 |
| <b>TP60</b>  | 43.69747899 | 16.77078328 | 29.28759894 | 22.7520436  |
| <b>TP61</b>  | 83.8028169  | 11.3152094  | 55.12820513 | 16.98675497 |
| <b>TP62</b>  | 57.97101449 | 9.250243427 | 25.31824611 | 15.48809934 |
| <b>TP15R</b> | 49.82206406 | 44.24352019 | 43.02213667 | 44.34373951 |
| <b>TP40R</b> | 67.75067751 | 48.48280512 | 47.35042735 | 50.39708802 |
| <b>TP63</b>  | 44.36619718 | 4.430705822 | 13.87337058 | 9.439341147 |

|       |             |             |             |             |
|-------|-------------|-------------|-------------|-------------|
| TP64  | 65.40880503 | 21.70308968 | 52.39085239 | 28.29386764 |
| TP65  | 87.05882353 | 49.5862069  | 55.87583149 | 55.49378679 |
| TP66  | 95.10204082 | 78.1048758  | 72.92954265 | 76.6779661  |
| TP67  | 61.11111111 | 53.02547771 | 37.98029557 | 44.17317708 |
| TP68  | 45.38653367 | 53.26797386 | 31.47097337 | 35.55703803 |
| TP69  | 25.99277978 | 47.13375796 | 28.92352302 | 29.56467272 |
| TP70  | 25.92592593 | 24.66887417 | 18.10845707 | 19.76313842 |
| TP71  | 31.75287356 | 6.900775827 | 17.20430108 | 12.66886821 |
| TP72  | 57.30659026 | 23.964616   | 50.38961039 | 30.73579634 |
| TP73  | 57.02746365 | 41.63955758 | 41.41414141 | 47.81901042 |
| TP74  | 74.40225035 | 34.12256267 | 57.40740741 | 45.26315789 |
| TP75  | 83.08351178 | 36.25512868 | 59.88372093 | 44.06626506 |
| TP76  | 64.00394477 | 41.63461538 | 45.40229885 | 48.77600979 |
| TP77  | 47.23320158 | 30.22243714 | 32.33532934 | 35.6328919  |
| TP78  | 44.17293233 | 20.50251256 | 31.54761905 | 28.89509621 |
| TP79  | 80.34118603 | 56.92391899 | 77.86885246 | 66.79245283 |
| TP80  | 88.39779006 | 51.43721634 | 74.4047619  | 63.64528796 |
| TP81  | 93.44608879 | 44.32220039 | 81.81818182 | 53.56581841 |
| TP82  | 100         | 15.61583578 | 47.66839378 | 23.68180433 |
| TP83  | 100         | 33.54037267 | 37.6146789  | 39.11067835 |
| TP84  | 100         | 75.80824972 | 69.62025316 | 72.4258846  |
| TP85  | 100         | 33.06122449 | 30.65502183 | 34.1980386  |
| TP86  | 100         | 70.97560976 | 74.27912341 | 74.304      |
| TP87  | 100         | 43.95424837 | 32.5734327  | 37.87978864 |
| TP88  | 41.58878505 | 23.18992655 | 20.21829522 | 22.61404076 |
| TP89  | 100         | 76.30040912 | 100         | 83.25763832 |
| TP90  | 74.43946188 | 32.37753883 | 40.57142857 | 38.59705317 |
| TP91  | 25.9811617  | 13.68491322 | 15.80882353 | 19.02102497 |
| TP92  | 100         | 64.14162207 | 100         | 72.48025276 |
| TP93  | 12.5        | 13.11314585 | 24.42428472 | 16.56310264 |
| TP94  | 100         | 37.17253839 | 62.5        | 47.35393087 |
| TP49R | 100         | 78.15299793 | 87.76520509 | 83.68841545 |
| TP58R | 100         | 86.57829329 | 81.85907046 | 86.28183362 |

**Table S6. Summary of Monomer Conversion.** Summary of monomer and overall conversion for all 89 terpolymerization reactions. R stands for a repeat of the experiment of a given condition.

### 3.5. Summary of Monomer <sup>1</sup>H Integration Values for Terpolymer Samples

The following table summarizes the <sup>1</sup>H integration values for each monomer functional group peak in the terpolymer sample for all 89 terpolymerization reactions:

| Sample | Sty Integration | Myr Integration | DBI Integration |
|--------|-----------------|-----------------|-----------------|
| TP1    | 1               | 0.138           | 0.557           |

|              |   |        |        |
|--------------|---|--------|--------|
| <b>TP2</b>   | 1 | 1.142  | 0.039  |
| <b>TP3</b>   | 1 | 0.501  | 0.869  |
| <b>TP4</b>   | 1 | 0.167  | 0.116  |
| <b>TP5</b>   | 1 | 0.889  | 0.895  |
| <b>TP6</b>   | 1 | 22.855 | 40.372 |
| <b>TP7</b>   | 1 | 0.014  | 1.065  |
| <b>TP8</b>   | 1 | 0.036  | 0.499  |
| <b>TP9</b>   | 1 | 1.325  | 1.09   |
| <b>TP10</b>  | 1 | 0.755  | 1.813  |
| <b>TP11</b>  | 1 | 0.885  | 1.562  |
| <b>TP12</b>  | 1 | 4.377  | 7.056  |
| <b>TP13</b>  | 1 | 1.957  | 4.306  |
| <b>TP15</b>  | 1 | 0.062  | 0.674  |
| <b>TP16</b>  | 1 | 4.872  | 2.891  |
| <b>TP17</b>  | 1 | 1.72   | 3.667  |
| <b>TP18</b>  | 1 | 0.269  | 0.221  |
| <b>TP19</b>  | 1 | 0.274  | 0.626  |
| <b>TP21</b>  | 1 | 1.901  | 4.077  |
| <b>TP22</b>  | 1 | 1.002  | 1.599  |
| <b>TP23</b>  | 1 | 3.583  | 5.406  |
| <b>TP24</b>  | 1 | 1.054  | 0.863  |
| <b>TP8R</b>  | 1 | 0.045  | 0.5    |
| <b>TP36</b>  | 1 | 0.633  | 1.133  |
| <b>TP7R</b>  | 1 | 0.019  | 1.02   |
| <b>TP8R2</b> | 1 | 0.058  | 0.515  |
| <b>TP19R</b> | 1 | 0.299  | 0.616  |
| <b>TP37</b>  | 1 | 0.532  | 2.15   |
| <b>TP38</b>  | 1 | 0.873  | 1.474  |
| <b>TP39</b>  | 1 | 0.789  | 3.369  |
| <b>TP40</b>  | 1 | 0.177  | 0.784  |
| <b>TP41</b>  | 1 | 0.38   | 0.223  |
| <b>TP42</b>  | 1 | 0.953  | 1.663  |
| <b>TP43</b>  | 1 | 0.216  | 0.678  |
| <b>TP44</b>  | 1 | 0.411  | 0.652  |
| <b>TP45</b>  | 1 | 2.035  | 2.783  |
| <b>TP46</b>  | 1 | 1.632  | 1.602  |
| <b>TP47</b>  | 1 | 0.72   | 1.58   |
| <b>TP48</b>  | 1 | 0.328  | 0.509  |
| <b>TP49</b>  | 1 | 0.043  | 0.533  |
| <b>TP50</b>  | 1 | 2.609  | 2.033  |
| <b>TP51</b>  | 1 | 0.734  | 1.264  |
| <b>TP52</b>  | 1 | 4.853  | 1.635  |
| <b>TP53</b>  | 1 | 0.313  | 0.851  |

|              |   |       |        |
|--------------|---|-------|--------|
| <b>TP54</b>  | 1 | 0.01  | 0.124  |
| <b>TP55</b>  | 1 | 0.493 | 0.681  |
| <b>TP56</b>  | 1 | 0.275 | 0.095  |
| <b>TP57</b>  | 1 | 1.449 | 3.401  |
| <b>TP58</b>  | 1 | 0.152 | 0.611  |
| <b>TP59</b>  | 1 | 3.157 | 5.806  |
| <b>TP60</b>  | 1 | 0.695 | 2.74   |
| <b>TP61</b>  | 1 | 0.306 | 4.135  |
| <b>TP62</b>  | 1 | 0.093 | 1.12   |
| <b>TP15R</b> | 1 | 0.053 | 0.668  |
| <b>TP40R</b> | 1 | 0.195 | 0.762  |
| <b>TP63</b>  | 1 | 0.04  | 0.661  |
| <b>TP64</b>  | 1 | 0.059 | 1.52   |
| <b>TP65</b>  | 1 | 0.068 | 0.626  |
| <b>TP66</b>  | 1 | 0.068 | 0.506  |
| <b>TP67</b>  | 1 | 0.036 | 0.241  |
| <b>TP68</b>  | 1 | 0.062 | 0.122  |
| <b>TP69</b>  | 1 | 0.05  | 0.057  |
| <b>TP70</b>  | 1 | 0.034 | 0.175  |
| <b>TP71</b>  | 1 | 2.683 | 8.821  |
| <b>TP72</b>  | 1 | 0.373 | 2.297  |
| <b>TP73</b>  | 1 | 2.62  | 4.956  |
| <b>TP74</b>  | 1 | 1.427 | 4.643  |
| <b>TP75</b>  | 1 | 1.225 | 6.966  |
| <b>TP76</b>  | 1 | 3.452 | 8.906  |
| <b>TP77</b>  | 1 | 4.205 | 9.987  |
| <b>TP78</b>  | 1 | 4.083 | 9.64   |
| <b>TP79</b>  | 1 | 5.559 | 12.093 |
| <b>TP80</b>  | 1 | 3.032 | 8.427  |
| <b>TP81</b>  | 1 | 1.138 | 6.527  |
| <b>TP82</b>  | 1 | 0.162 | 1.989  |
| <b>TP83</b>  | 1 | 0.035 | 0.423  |
| <b>TP84</b>  | 1 | 0.183 | 0.346  |
| <b>TP85</b>  | 1 | 0.091 | 0.271  |
| <b>TP86</b>  | 1 | 0.131 | 0.498  |
| <b>TP87</b>  | 1 | 0.086 | 0.235  |
| <b>TP88</b>  | 1 | 0.194 | 0.49   |
| <b>TP89</b>  | 1 | 0.271 | 1.1    |
| <b>TP90</b>  | 1 | 0.164 | 0.711  |
| <b>TP91</b>  | 1 | 2.228 | 3.065  |
| <b>TP92</b>  | 1 | 0.619 | 2.692  |
| <b>TP93</b>  | 1 | 0.184 | 0.745  |
| <b>TP94</b>  | 1 | 0.276 | 0.91   |

|       |   |       |       |
|-------|---|-------|-------|
| TP49R | 1 | 0.021 | 0.496 |
| TP58R | 1 | 0.182 | 0.59  |

**Table S7. Summary of Monomer 1H Integration Values for Terpolymer Samples.** Summary of monomer <sup>1</sup>H integration values for each monomer functional group peak in the terpolymer sample for all 89 terpolymerization reactions. The <sup>1</sup>H integration is standardized to 1. R stands for a repeat of the experiment of a given condition.

### 3.6. Summary of <sup>1</sup>H Protons per Integration for Terpolymer Samples

The following table summarizes the <sup>1</sup>H integration values per proton for each monomer functional group peak in the terpolymer sample for all 89 terpolymerization reactions:

| Sample | Sty Proton Per Integration | Myr Proton Per Integration | DBI Proton Per Integration |
|--------|----------------------------|----------------------------|----------------------------|
| TP1    | 0.2                        | 0.069                      | 0.1393                     |
| TP2    | 0.2                        | 0.571                      | 0.0098                     |
| TP3    | 0.2                        | 0.2505                     | 0.2173                     |
| TP4    | 0.2                        | 0.0835                     | 0.029                      |
| TP5    | 0.2                        | 0.4445                     | 0.2238                     |
| TP6    | 0.2                        | 11.428                     | 10.093                     |
| TP7    | 0.2                        | 0.007                      | 0.2663                     |
| TP8    | 0.2                        | 0.018                      | 0.1248                     |
| TP9    | 0.2                        | 0.6625                     | 0.2725                     |
| TP10   | 0.2                        | 0.3775                     | 0.4533                     |
| TP11   | 0.2                        | 0.4425                     | 0.3905                     |
| TP12   | 0.2                        | 2.1885                     | 1.764                      |
| TP13   | 0.2                        | 0.9785                     | 1.0765                     |
| TP15   | 0.2                        | 0.031                      | 0.1685                     |
| TP16   | 0.2                        | 2.436                      | 0.7228                     |
| TP17   | 0.2                        | 0.86                       | 0.9168                     |
| TP18   | 0.2                        | 0.1345                     | 0.0553                     |
| TP19   | 0.2                        | 0.137                      | 0.1565                     |
| TP21   | 0.2                        | 0.9505                     | 1.0193                     |
| TP22   | 0.2                        | 0.501                      | 0.3998                     |
| TP23   | 0.2                        | 1.7915                     | 1.3515                     |
| TP24   | 0.2                        | 0.527                      | 0.2158                     |
| TP8R   | 0.2                        | 0.0225                     | 0.125                      |
| TP36   | 0.2                        | 0.3165                     | 0.2833                     |
| TP7R   | 0.2                        | 0.0095                     | 0.255                      |
| TP8R2  | 0.2                        | 0.029                      | 0.1288                     |
| TP19R  | 0.2                        | 0.1495                     | 0.154                      |
| TP37   | 0.2                        | 0.266                      | 0.5375                     |
| TP38   | 0.2                        | 0.4365                     | 0.3685                     |
| TP39   | 0.2                        | 0.3945                     | 0.8423                     |
| TP40   | 0.2                        | 0.0885                     | 0.196                      |

|              |     |        |        |
|--------------|-----|--------|--------|
| <b>TP41</b>  | 0.2 | 0.19   | 0.0558 |
| <b>TP42</b>  | 0.2 | 0.4765 | 0.4158 |
| <b>TP43</b>  | 0.2 | 0.108  | 0.1695 |
| <b>TP44</b>  | 0.2 | 0.2055 | 0.163  |
| <b>TP45</b>  | 0.2 | 1.0175 | 0.6958 |
| <b>TP46</b>  | 0.2 | 0.816  | 0.4005 |
| <b>TP47</b>  | 0.2 | 0.36   | 0.395  |
| <b>TP48</b>  | 0.2 | 0.164  | 0.1273 |
| <b>TP49</b>  | 0.2 | 0.0215 | 0.1333 |
| <b>TP50</b>  | 0.2 | 1.3045 | 0.5083 |
| <b>TP51</b>  | 0.2 | 0.367  | 0.316  |
| <b>TP52</b>  | 0.2 | 2.4265 | 0.4088 |
| <b>TP53</b>  | 0.2 | 0.1565 | 0.2128 |
| <b>TP54</b>  | 0.2 | 0.005  | 0.031  |
| <b>TP55</b>  | 0.2 | 0.2465 | 0.1703 |
| <b>TP56</b>  | 0.2 | 0.1375 | 0.0238 |
| <b>TP57</b>  | 0.2 | 0.7245 | 0.8503 |
| <b>TP58</b>  | 0.2 | 0.076  | 0.1528 |
| <b>TP59</b>  | 0.2 | 1.5785 | 1.4515 |
| <b>TP60</b>  | 0.2 | 0.3475 | 0.685  |
| <b>TP61</b>  | 0.2 | 0.153  | 1.0338 |
| <b>TP62</b>  | 0.2 | 0.0465 | 0.28   |
| <b>TP15R</b> | 0.2 | 0.0265 | 0.167  |
| <b>TP40R</b> | 0.2 | 0.0975 | 0.1905 |
| <b>TP63</b>  | 0.2 | 0.02   | 0.1653 |
| <b>TP64</b>  | 0.2 | 0.0295 | 0.38   |
| <b>TP65</b>  | 0.2 | 0.034  | 0.1565 |
| <b>TP66</b>  | 0.2 | 0.034  | 0.1265 |
| <b>TP67</b>  | 0.2 | 0.018  | 0.0603 |
| <b>TP68</b>  | 0.2 | 0.031  | 0.0305 |
| <b>TP69</b>  | 0.2 | 0.025  | 0.0143 |
| <b>TP70</b>  | 0.2 | 0.017  | 0.0438 |
| <b>TP71</b>  | 0.2 | 1.3415 | 2.2053 |
| <b>TP72</b>  | 0.2 | 0.1865 | 0.5743 |
| <b>TP73</b>  | 0.2 | 1.31   | 1.239  |
| <b>TP74</b>  | 0.2 | 0.7135 | 1.1608 |
| <b>TP75</b>  | 0.2 | 0.6125 | 1.7415 |
| <b>TP76</b>  | 0.2 | 1.726  | 2.2265 |
| <b>TP77</b>  | 0.2 | 2.1025 | 2.4968 |
| <b>TP78</b>  | 0.2 | 2.0415 | 2.41   |
| <b>TP79</b>  | 0.2 | 2.7795 | 3.0233 |
| <b>TP80</b>  | 0.2 | 1.516  | 2.1068 |
| <b>TP81</b>  | 0.2 | 0.569  | 1.6318 |

|       |     |        |        |
|-------|-----|--------|--------|
| TP82  | 0.2 | 0.081  | 0.4973 |
| TP83  | 0.2 | 0.0175 | 0.1058 |
| TP84  | 0.2 | 0.0915 | 0.0865 |
| TP85  | 0.2 | 0.0455 | 0.0678 |
| TP86  | 0.2 | 0.0655 | 0.1245 |
| TP87  | 0.2 | 0.043  | 0.0588 |
| TP88  | 0.2 | 0.097  | 0.1225 |
| TP89  | 0.2 | 0.1355 | 0.275  |
| TP90  | 0.2 | 0.082  | 0.1778 |
| TP91  | 0.2 | 1.114  | 0.7663 |
| TP92  | 0.2 | 0.3095 | 0.673  |
| TP93  | 0.2 | 0.092  | 0.1863 |
| TP94  | 0.2 | 0.138  | 0.2275 |
| TP49R | 0.2 | 0.0105 | 0.124  |
| TP58R | 0.2 | 0.091  | 0.1475 |

**Table S8. Summary of Monomer  $^1H$  Integration Values per proton for Terpolymer Samples.** Summary of monomer  $^1H$  integration values for each monomer normalized against the number of protons in the terpolymer sample for all 89 terpolymerization reactions. The  $^1H$  integration for Styrene is standardized to 0.2 as there are 5 protons in the phenyl ring of styrene. R stands for a repeat of the experiment of a given condition.

### 3.7. Summary of Monomer Incorporation in All Terpolymer Samples

The following table summarizes the percentage monomer incorporation each monomer in the terpolymer sample for all 89 terpolymerization reactions:

| Sample | Sty Incorporation (mol%) | Myr Incorporation (mol%) | DBI Incorporation (mol%) |
|--------|--------------------------|--------------------------|--------------------------|
| TP1    | 48.99                    | 16.901                   | 34.109                   |
| TP2    | 25.616                   | 73.135                   | 1.2488                   |
| TP3    | 29.951                   | 37.514                   | 32.535                   |
| TP4    | 64                       | 26.72                    | 9.28                     |
| TP5    | 23.035                   | 51.195                   | 25.77                    |
| TP6    | 0.9208                   | 52.612                   | 46.468                   |
| TP7    | 42.261                   | 1.4791                   | 56.26                    |
| TP8    | 58.352                   | 5.2516                   | 36.397                   |
| TP9    | 17.621                   | 58.37                    | 24.009                   |
| TP10   | 19.403                   | 36.624                   | 43.973                   |
| TP11   | 19.361                   | 42.836                   | 37.803                   |
| TP12   | 4.8164                   | 52.703                   | 42.48                    |
| TP13   | 8.8692                   | 43.392                   | 47.738                   |
| TP15   | 50.063                   | 7.7597                   | 42.178                   |
| TP16   | 5.9546                   | 72.527                   | 21.518                   |
| TP17   | 10.118                   | 43.506                   | 46.377                   |
| TP18   | 51.315                   | 34.509                   | 14.176                   |

|              |        |        |        |
|--------------|--------|--------|--------|
| <b>TP19</b>  | 40.527 | 27.761 | 31.712 |
| <b>TP21</b>  | 9.2177 | 43.807 | 46.975 |
| <b>TP22</b>  | 18.169 | 45.514 | 36.316 |
| <b>TP23</b>  | 5.9827 | 53.59  | 40.428 |
| <b>TP24</b>  | 21.215 | 55.9   | 22.885 |
| <b>TP8R</b>  | 57.554 | 6.4748 | 35.971 |
| <b>TP36</b>  | 25.008 | 39.575 | 35.417 |
| <b>TP7R</b>  | 43.057 | 2.0452 | 54.898 |
| <b>TP8R2</b> | 55.905 | 8.1062 | 35.989 |
| <b>TP19R</b> | 39.722 | 29.692 | 30.586 |
| <b>TP37</b>  | 19.93  | 26.507 | 53.563 |
| <b>TP38</b>  | 19.9   | 43.433 | 36.667 |
| <b>TP39</b>  | 13.92  | 27.458 | 58.622 |
| <b>TP40</b>  | 41.28  | 18.266 | 40.454 |
| <b>TP41</b>  | 44.868 | 42.625 | 12.507 |
| <b>TP42</b>  | 18.311 | 43.626 | 38.064 |
| <b>TP43</b>  | 41.885 | 22.618 | 35.497 |
| <b>TP44</b>  | 35.18  | 36.148 | 28.672 |
| <b>TP45</b>  | 10.453 | 53.182 | 36.365 |
| <b>TP46</b>  | 14.119 | 57.607 | 28.274 |
| <b>TP47</b>  | 20.942 | 37.696 | 41.361 |
| <b>TP48</b>  | 40.712 | 33.384 | 25.903 |
| <b>TP49</b>  | 56.378 | 6.0606 | 37.562 |
| <b>TP50</b>  | 9.9367 | 64.812 | 25.252 |
| <b>TP51</b>  | 22.65  | 41.563 | 35.787 |
| <b>TP52</b>  | 6.5892 | 79.944 | 13.467 |
| <b>TP53</b>  | 35.134 | 27.492 | 37.374 |
| <b>TP54</b>  | 84.746 | 2.1186 | 13.136 |
| <b>TP55</b>  | 32.428 | 39.968 | 27.604 |
| <b>TP56</b>  | 55.363 | 38.062 | 6.5744 |
| <b>TP57</b>  | 11.269 | 40.823 | 47.908 |
| <b>TP58</b>  | 46.647 | 17.726 | 35.627 |
| <b>TP59</b>  | 6.192  | 48.87  | 44.938 |
| <b>TP60</b>  | 16.227 | 28.195 | 55.578 |
| <b>TP61</b>  | 14.422 | 11.033 | 74.545 |
| <b>TP62</b>  | 37.987 | 8.8319 | 53.181 |
| <b>TP15R</b> | 50.826 | 6.7344 | 42.44  |
| <b>TP40R</b> | 40.984 | 19.98  | 39.037 |
| <b>TP63</b>  | 51.914 | 5.1914 | 42.894 |
| <b>TP64</b>  | 32.814 | 4.84   | 62.346 |
| <b>TP65</b>  | 51.216 | 8.7068 | 40.077 |
| <b>TP66</b>  | 55.479 | 9.4313 | 35.09  |
| <b>TP67</b>  | 71.878 | 6.469  | 21.653 |



|       |        |        |        |
|-------|--------|--------|--------|
| TP68  | 76.482 | 11.855 | 11.663 |
| TP69  | 83.595 | 10.449 | 5.9561 |
| TP70  | 76.702 | 6.5197 | 16.779 |
| TP71  | 5.338  | 35.804 | 58.858 |
| TP72  | 20.817 | 19.412 | 59.771 |
| TP73  | 7.2754 | 47.654 | 45.071 |
| TP74  | 9.642  | 34.398 | 55.96  |
| TP75  | 7.8309 | 23.982 | 68.187 |
| TP76  | 4.8164 | 41.565 | 53.618 |
| TP77  | 4.1673 | 43.809 | 52.024 |
| TP78  | 4.2997 | 43.889 | 51.811 |
| TP79  | 3.3318 | 46.304 | 50.364 |
| TP80  | 5.2318 | 39.657 | 55.111 |
| TP81  | 8.3307 | 23.701 | 67.968 |
| TP82  | 25.699 | 10.408 | 63.893 |
| TP83  | 61.872 | 5.4138 | 32.715 |
| TP84  | 52.91  | 24.206 | 22.884 |
| TP85  | 63.847 | 14.525 | 21.628 |
| TP86  | 51.282 | 16.795 | 31.923 |
| TP87  | 66.28  | 14.25  | 19.47  |
| TP88  | 47.676 | 23.123 | 29.201 |
| TP89  | 32.76  | 22.195 | 45.045 |
| TP90  | 43.502 | 17.836 | 38.662 |
| TP91  | 9.6142 | 53.551 | 36.835 |
| TP92  | 16.913 | 26.173 | 56.913 |
| TP93  | 41.819 | 19.237 | 38.944 |
| TP94  | 35.367 | 24.403 | 40.23  |
| TP49R | 59.791 | 3.139  | 37.07  |
| TP58R | 45.61  | 20.753 | 33.637 |

*Table S9. Summary of Percentage Monomer Incorporation in All Terpolymer Samples. Summary of percentage monomer incorporation into the final terpolymer. R stands for a repeat of the experiment of a given condition.*

### **3.8. Summary of Molecular Weight Statistics for All Terpolymer Samples**

The following table summarizes the molecular weight (MW) information for all 89 terpolymer samples:

| Sample | Mn    | Mw    | Mz    | Mp    | PDI    | MW<br>10%<br>Low | MW<br>10%<br>High | Asymmetry<br>Factor |
|--------|-------|-------|-------|-------|--------|------------------|-------------------|---------------------|
| TP1    | 13523 | 23270 | 35694 | 20559 | 1.7208 | 4924             | 61576             | 1.3028              |
| TP2    | 4797  | 6534  | 8880  | 5329  | 1.3621 | 2202             | 15305             | 0.8377              |
| TP3    | 17188 | 25585 | 36212 | 22248 | 1.4885 | 6980             | 62372             | 1.1245              |

|              |       |        |        |        |        |       |        |        |
|--------------|-------|--------|--------|--------|--------|-------|--------|--------|
| <b>TP4</b>   | 19075 | 32779  | 49704  | 29968  | 1.7184 | 6685  | 85315  | 1.434  |
| <b>TP5</b>   | 10715 | 17308  | 25805  | 16280  | 1.6153 | 4061  | 44265  | 1.3882 |
| <b>TP6</b>   | 64280 | 113998 | 175664 | 102814 | 1.7735 | 22201 | 301545 | 1.4245 |
| <b>TP7</b>   | 13005 | 20490  | 30448  | 17271  | 1.5755 | 5025  | 52750  | 1.1057 |
| <b>TP8</b>   | 25143 | 37117  | 52887  | 30717  | 1.4762 | 10530 | 91579  | 0.98   |
| <b>TP9</b>   | 12936 | 22012  | 34806  | 17860  | 1.7016 | 4753  | 60315  | 1.0877 |
| <b>TP10</b>  | 20491 | 32635  | 48599  | 27724  | 1.5927 | 7846  | 84084  | 1.1377 |
| <b>TP11</b>  | 7760  | 12031  | 17691  | 9821   | 1.5504 | 3062  | 30563  | 1.0266 |
| <b>TP12</b>  | 12356 | 20523  | 31822  | 17743  | 1.661  | 4606  | 54593  | 1.1999 |
| <b>TP13</b>  | 47208 | 78583  | 114682 | 76836  | 1.6646 | 16572 | 195608 | 1.6416 |
| <b>TP15</b>  | 11445 | 16882  | 23430  | 16077  | 1.4751 | 4563  | 39997  | 1.3818 |
| <b>TP16</b>  | 20375 | 31731  | 45542  | 28597  | 1.5573 | 7692  | 78098  | 1.307  |
| <b>TP17</b>  | 37131 | 58983  | 84007  | 57937  | 1.5885 | 13749 | 142692 | 1.5958 |
| <b>TP18</b>  | 12377 | 18265  | 25339  | 17877  | 1.4757 | 4918  | 43062  | 1.4681 |
| <b>TP19</b>  | 19589 | 29834  | 42253  | 26922  | 1.523  | 7578  | 72519  | 1.2793 |
| <b>TP21</b>  | 44067 | 69716  | 98994  | 68249  | 1.582  | 16312 | 168550 | 1.5831 |
| <b>TP22</b>  | 17468 | 26321  | 37631  | 22783  | 1.5068 | 6927  | 64752  | 1.1398 |
| <b>TP23</b>  | 16377 | 24354  | 34597  | 20723  | 1.4871 | 6612  | 59628  | 1.0809 |
| <b>TP24</b>  | 10863 | 16511  | 23635  | 15753  | 1.5199 | 4244  | 40512  | 1.3885 |
| <b>TP8R</b>  | 16401 | 23735  | 32953  | 20856  | 1.4472 | 6836  | 56618  | 1.1169 |
| <b>TP36</b>  | 56187 | 95959  | 145044 | 83174  | 1.7079 | 20005 | 249983 | 1.2949 |
| <b>TP7R</b>  | 12442 | 19285  | 27453  | 17159  | 1.55   | 4827  | 47196  | 1.2535 |
| <b>TP8R2</b> | 18425 | 26756  | 37114  | 23894  | 1.4522 | 7589  | 63752  | 1.1687 |
| <b>TP19R</b> | 17648 | 27034  | 38345  | 24176  | 1.5318 | 6871  | 65766  | 1.2571 |
| <b>TP37</b>  | 12573 | 19741  | 28965  | 17209  | 1.5701 | 4844  | 49934  | 1.19   |
| <b>TP38</b>  | 8443  | 14507  | 22631  | 12630  | 1.7182 | 3101  | 39036  | 1.2445 |
| <b>TP39</b>  | 9401  | 13609  | 19113  | 12078  | 1.4476 | 3931  | 32846  | 1.122  |
| <b>TP40</b>  | 9118  | 15157  | 22514  | 14160  | 1.6623 | 3366  | 38703  | 1.4288 |
| <b>TP41</b>  | 9085  | 15285  | 23549  | 14154  | 1.6824 | 3301  | 40379  | 1.3887 |
| <b>TP42</b>  | 6543  | 10328  | 15390  | 8360   | 1.5785 | 2556  | 26586  | 1.0243 |
| <b>TP43</b>  | 31613 | 61729  | 111989 | 40567  | 1.9526 | 11169 | 191622 | 0.8308 |
| <b>TP44</b>  | 10966 | 18801  | 28497  | 17436  | 1.7145 | 3861  | 49013  | 1.4587 |
| <b>TP45</b>  | 13658 | 23263  | 35850  | 20184  | 1.7033 | 4888  | 61764  | 1.2679 |
| <b>TP46</b>  | 12404 | 20532  | 31452  | 18493  | 1.6553 | 4503  | 53730  | 1.3245 |
| <b>TP47</b>  | 10286 | 16478  | 24365  | 15450  | 1.602  | 3891  | 41804  | 1.3853 |
| <b>TP48</b>  | 6739  | 11128  | 16974  | 9182   | 1.6513 | 2524  | 29222  | 1.1155 |
| <b>TP49</b>  | 12094 | 19530  | 28874  | 17537  | 1.6149 | 4481  | 49592  | 1.3126 |
| <b>TP50</b>  | 6506  | 10170  | 15228  | 8244   | 1.5632 | 2560  | 26276  | 1.0089 |
| <b>TP51</b>  | 17209 | 27387  | 40091  | 24153  | 1.5914 | 6438  | 68977  | 1.26   |
| <b>TP52</b>  | 7940  | 13039  | 20046  | 11037  | 1.6422 | 2964  | 34544  | 1.1523 |
| <b>TP53</b>  | 8636  | 14181  | 21906  | 11516  | 1.6421 | 3237  | 37905  | 1.0653 |
| <b>TP54</b>  | 7080  | 11862  | 18040  | 10274  | 1.6754 | 2584  | 30967  | 1.251  |
| <b>TP55</b>  | 10205 | 17194  | 25973  | 16363  | 1.6849 | 3632  | 44515  | 1.504  |

|              |       |       |       |       |        |       |        |        |
|--------------|-------|-------|-------|-------|--------|-------|--------|--------|
| <b>TP56</b>  | 19658 | 31011 | 44585 | 27757 | 1.5775 | 7395  | 76714  | 1.3011 |
| <b>TP57</b>  | 12181 | 19232 | 28415 | 17117 | 1.5789 | 4648  | 48973  | 1.2401 |
| <b>TP58</b>  | 8349  | 13740 | 20978 | 12254 | 1.6457 | 3100  | 36159  | 1.2702 |
| <b>TP59</b>  | 22988 | 36332 | 54004 | 31583 | 1.5805 | 8803  | 92703  | 1.1864 |
| <b>TP60</b>  | 27903 | 44869 | 66321 | 39054 | 1.608  | 10434 | 113623 | 1.2359 |
| <b>TP61</b>  | 24034 | 31506 | 40968 | 27466 | 1.3109 | 11133 | 69558  | 0.9718 |
| <b>TP62</b>  | 28755 | 47543 | 72025 | 40131 | 1.6534 | 10607 | 123842 | 1.1808 |
| <b>TP15R</b> | 11692 | 18534 | 27614 | 15750 | 1.5852 | 4486  | 47720  | 1.1329 |
| <b>TP40R</b> | 9339  | 14995 | 22236 | 14146 | 1.6056 | 3447  | 38095  | 1.4253 |
| <b>TP63</b>  | 34907 | 58040 | 89909 | 51405 | 1.6627 | 13037 | 153986 | 1.2505 |
| <b>TP64</b>  | 19866 | 29029 | 40915 | 24356 | 1.4612 | 8222  | 70786  | 1.0179 |
| <b>TP65</b>  | 14294 | 24758 | 38516 | 21095 | 1.7321 | 5123  | 66502  | 1.2326 |
| <b>TP66</b>  | 11921 | 19993 | 30234 | 18179 | 1.6771 | 4238  | 52098  | 1.3831 |
| <b>TP67</b>  | 17109 | 31459 | 49576 | 28157 | 1.8387 | 5689  | 85282  | 1.4432 |
| <b>TP68</b>  | 12132 | 21626 | 33086 | 20078 | 1.7826 | 4084  | 56665  | 1.5349 |
| <b>TP69</b>  | 11768 | 20740 | 31251 | 19633 | 1.7624 | 3988  | 53371  | 1.5938 |
| <b>TP70</b>  | 16118 | 28127 | 42170 | 26190 | 1.7451 | 5542  | 72107  | 1.5334 |
| <b>TP71</b>  | 36211 | 60224 | 90386 | 56831 | 1.6631 | 13190 | 154462 | 1.4608 |
| <b>TP72</b>  | 22253 | 36518 | 54867 | 31033 | 1.641  | 8360  | 94657  | 1.1761 |
| <b>TP73</b>  | 14627 | 23966 | 35879 | 21274 | 1.6385 | 5340  | 61669  | 1.2988 |
| <b>TP74</b>  | 17858 | 28882 | 42937 | 25425 | 1.6173 | 6663  | 74192  | 1.2505 |
| <b>TP75</b>  | 11483 | 16873 | 23713 | 15118 | 1.4694 | 4628  | 40676  | 1.196  |
| <b>TP76</b>  | 14512 | 23473 | 35020 | 20350 | 1.6175 | 5406  | 60460  | 1.2173 |
| <b>TP77</b>  | 15921 | 25753 | 38549 | 22510 | 1.6175 | 5929  | 66477  | 1.232  |
| <b>TP78</b>  | 17908 | 28718 | 42120 | 26057 | 1.6036 | 6632  | 72367  | 1.3396 |
| <b>TP79</b>  | 15391 | 25286 | 38211 | 22111 | 1.6429 | 5630  | 65814  | 1.2541 |
| <b>TP80</b>  | 13128 | 20461 | 30199 | 17631 | 1.5586 | 5065  | 52189  | 1.1494 |
| <b>TP81</b>  | 15489 | 23861 | 35048 | 19499 | 1.5405 | 6096  | 60769  | 1.0229 |
| <b>TP82</b>  | 19136 | 28686 | 42353 | 22116 | 1.4991 | 7966  | 73729  | 0.848  |
| <b>TP83</b>  | 15184 | 25974 | 39302 | 23089 | 1.7106 | 5440  | 67664  | 1.3445 |
| <b>TP84</b>  | 9726  | 16895 | 25384 | 16463 | 1.7371 | 3349  | 43332  | 1.6455 |
| <b>TP85</b>  | 17594 | 29812 | 44119 | 27921 | 1.6944 | 6151  | 75490  | 1.5209 |
| <b>TP86</b>  | 10712 | 17690 | 26033 | 16597 | 1.6514 | 3884  | 44538  | 1.4713 |
| <b>TP87</b>  | 17987 | 31303 | 47146 | 28784 | 1.7403 | 6230  | 80645  | 1.4855 |
| <b>TP88</b>  | 29612 | 49638 | 73707 | 45159 | 1.6763 | 10569 | 126158 | 1.4136 |
| <b>TP89</b>  | 10017 | 17007 | 24250 | 17263 | 1.6978 | 3340  | 40856  | 1.9067 |
| <b>TP90</b>  | 29436 | 51572 | 79133 | 45775 | 1.752  | 10508 | 135851 | 1.3528 |
| <b>TP91</b>  | 20265 | 33305 | 48614 | 30784 | 1.6435 | 7316  | 83164  | 1.4459 |
| <b>TP92</b>  | 12125 | 18436 | 25832 | 17205 | 1.5205 | 4600  | 43969  | 1.4059 |
| <b>TP93</b>  | 26557 | 44472 | 66606 | 38292 | 1.6746 | 9677  | 114333 | 1.2574 |
| <b>TP94</b>  | 23284 | 37205 | 54011 | 32185 | 1.5979 | 8860  | 92859  | 1.2174 |
| <b>TP49R</b> | 13666 | 22683 | 33757 | 20301 | 1.6598 | 4972  | 58672  | 1.3256 |
| <b>TP58R</b> | 9959  | 16107 | 23519 | 15305 | 1.6173 | 3613  | 40283  | 1.4918 |

**Table S10. Summary of Molecular Weight Information for Terpolymer Samples.** Summary of Molecular Weight (MW) information for all 89 terpolymer samples. Results are derived from the GPC trace. R stands for a repeat of the experiment of a given condition.

### 3.9. Summary of $T_g$ and Negative Styrene Incorporation for All Terpolymer Samples

The following table summarizes the  $T_g$  (Deg C) and the Negative Styrene Incorporation (mol %) for all 89 terpolymer samples:

| Sample | $T_g$ (Deg C) | Negative Sty Incorporation (mol%) |
|--------|---------------|-----------------------------------|
| TP1    | -6.73         | -48.9896                          |
| TP2    | -43.13        | -25.6164                          |
| TP3    | -17.33        | -29.9513                          |
| TP4    | 7.76          | -64                               |
| TP5    | -32.22        | -23.0348                          |
| TP6    | -42.53        | -0.92079                          |
| TP7    | 12.76         | -42.261                           |
| TP8    | 13.64         | -58.3516                          |
| TP9    | -38.71        | -17.6211                          |
| TP10   | -24.74        | -19.4033                          |
| TP11   | -30.65        | -19.3611                          |
| TP12   | -41.71        | -4.81638                          |
| TP13   | -32.17        | -8.86918                          |
| TP15   | 5.64          | -50.0626                          |
| TP16   | -48.03        | -5.9546                           |
| TP17   | -35.89        | -10.1176                          |
| TP18   | -7.84         | -51.3149                          |
| TP19   | -15.4         | -40.5268                          |
| TP21   | -35.01        | -9.21765                          |
| TP22   | -32.59        | -18.1694                          |
| TP23   | -44.99        | -5.98265                          |
| TP24   | -39.05        | -21.2145                          |
| TP8R   | 5.61          | -57.554                           |
| TP36   | -24.21        | -25.0078                          |
| TP7R   | 9.14          | -43.0571                          |
| TP8R2  | 6.19          | -55.905                           |
| TP19R  | -19.35        | -39.7219                          |
| TP37   | -23.22        | -19.9302                          |
| TP38   | -38.83        | -19.9005                          |
| TP39   | -27.69        | -13.9203                          |
| TP40   | -2.68         | -41.2797                          |
| TP41   | -24.9         | -44.8682                          |
| TP42   | -31.85        | -18.3108                          |

|              |        |          |
|--------------|--------|----------|
| <b>TP43</b>  | -0.87  | -41.8848 |
| <b>TP44</b>  | -19.54 | -35.1803 |
| <b>TP45</b>  | -43.1  | -10.4534 |
| <b>TP46</b>  | -40.51 | -14.1193 |
| <b>TP47</b>  | -29.2  | -20.9424 |
| <b>TP48</b>  | -23.45 | -40.7125 |
| <b>TP49</b>  | 22.03  | -56.3777 |
| <b>TP50</b>  | -46.52 | -9.93665 |
| <b>TP51</b>  | -28.06 | -22.6501 |
| <b>TP52</b>  | -56.36 | -6.58924 |
| <b>TP53</b>  | -14.22 | -35.1339 |
| <b>TP54</b>  | 45.94  | -84.7458 |
| <b>TP55</b>  | -24.34 | -32.4281 |
| <b>TP56</b>  | -5.06  | -55.3633 |
| <b>TP57</b>  | -31.78 | -11.2692 |
| <b>TP58</b>  | 3.82   | -46.6472 |
| <b>TP59</b>  | -37.23 | -6.19195 |
| <b>TP60</b>  | -23.98 | -16.2272 |
| <b>TP61</b>  | -4.89  | -14.4222 |
| <b>TP62</b>  | 5.99   | -37.9867 |
| <b>TP15R</b> | 4.77   | -50.8259 |
| <b>TP40R</b> | -2.37  | -40.9836 |
| <b>TP63</b>  | 20.84  | -51.9143 |
| <b>TP64</b>  | 3.79   | -32.8138 |
| <b>TP65</b>  | 12.97  | -51.2164 |
| <b>TP66</b>  | 22.62  | -55.4785 |
| <b>TP67</b>  | 13.73  | -71.8778 |
| <b>TP68</b>  | 18.9   | -76.4818 |
| <b>TP69</b>  | 34.91  | -83.5946 |
| <b>TP70</b>  | 31.43  | -76.7018 |
| <b>TP71</b>  | -31.32 | -5.33796 |
| <b>TP72</b>  | -16.07 | -20.8171 |
| <b>TP73</b>  | -42.72 | -7.27537 |
| <b>TP74</b>  | -36.25 | -9.64204 |
| <b>TP75</b>  | -27.71 | -7.83085 |
| <b>TP76</b>  | -39.84 | -4.81638 |
| <b>TP77</b>  | -40.76 | -4.16732 |
| <b>TP78</b>  | -39.65 | -4.29969 |
| <b>TP79</b>  | -38.26 | -3.33181 |
| <b>TP80</b>  | -38.93 | -5.23184 |
| <b>TP81</b>  | -25.71 | -8.33073 |
| <b>TP82</b>  | -1.94  | -25.6987 |
| <b>TP83</b>  | 15.65  | -61.8716 |

|              |        |          |
|--------------|--------|----------|
| <b>TP84</b>  | 25.91  | -52.9101 |
| <b>TP85</b>  | 11.34  | -63.8468 |
| <b>TP86</b>  | 24.82  | -51.2821 |
| <b>TP87</b>  | 33.48  | -66.28   |
| <b>TP88</b>  | 24.58  | -47.6758 |
| <b>TP89</b>  | -0.78  | -32.76   |
| <b>TP90</b>  | 11.34  | -43.5019 |
| <b>TP91</b>  | -42.98 | -9.61423 |
| <b>TP92</b>  | -16.86 | -16.9133 |
| <b>TP93</b>  | -19.71 | -41.8191 |
| <b>TP94</b>  | 6.22   | -35.3669 |
| <b>TP49R</b> | 21.57  | -59.7907 |
| <b>TP58R</b> | 2.85   | -45.61   |

**Table S11. Summary of  $T_g$  and Negative Styrene Incorporation for all Terpolymer Samples.**

*Summary of the glass transition temperature as determined by the DSC analysis, and the negative styrene incorporation as determined by NMR analysis for all 89 terpolymer samples.*

### 3.10. Relationships Between Terpolymer Variables

In this section, we plot different terpolymer variables collected during the experiments in order to visualise the relationships between them:

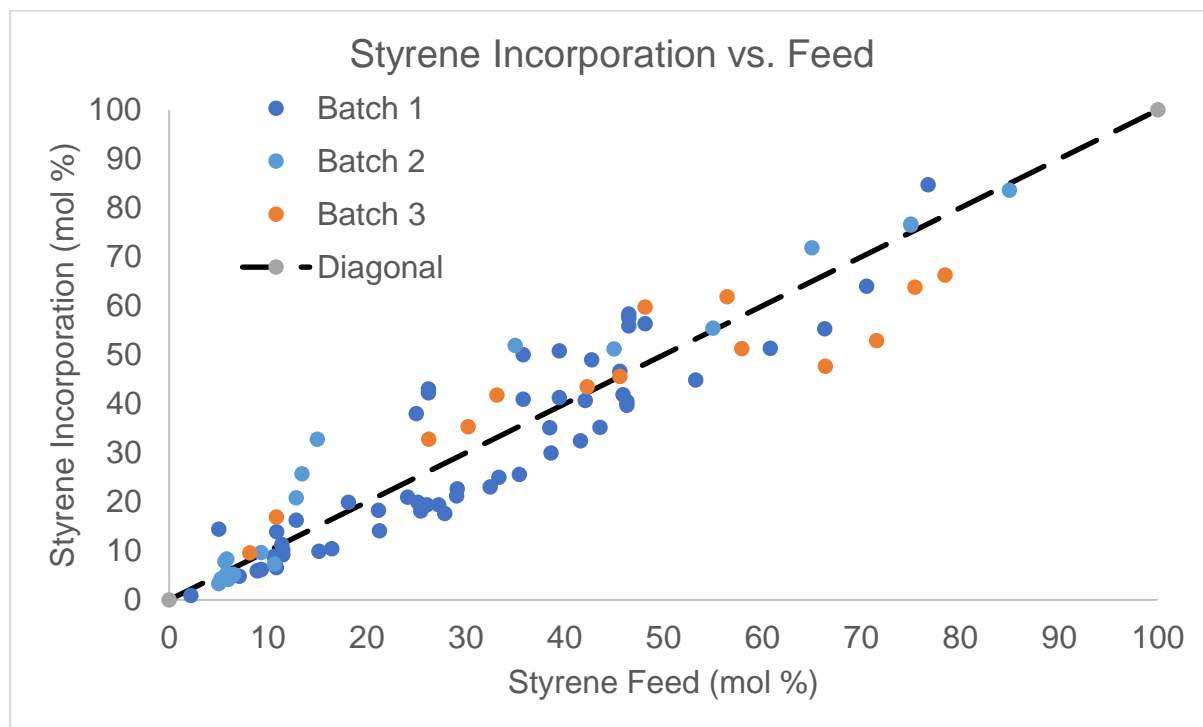

*Figure S12. Styrene Incorporation plotted against Styrene Feed.*

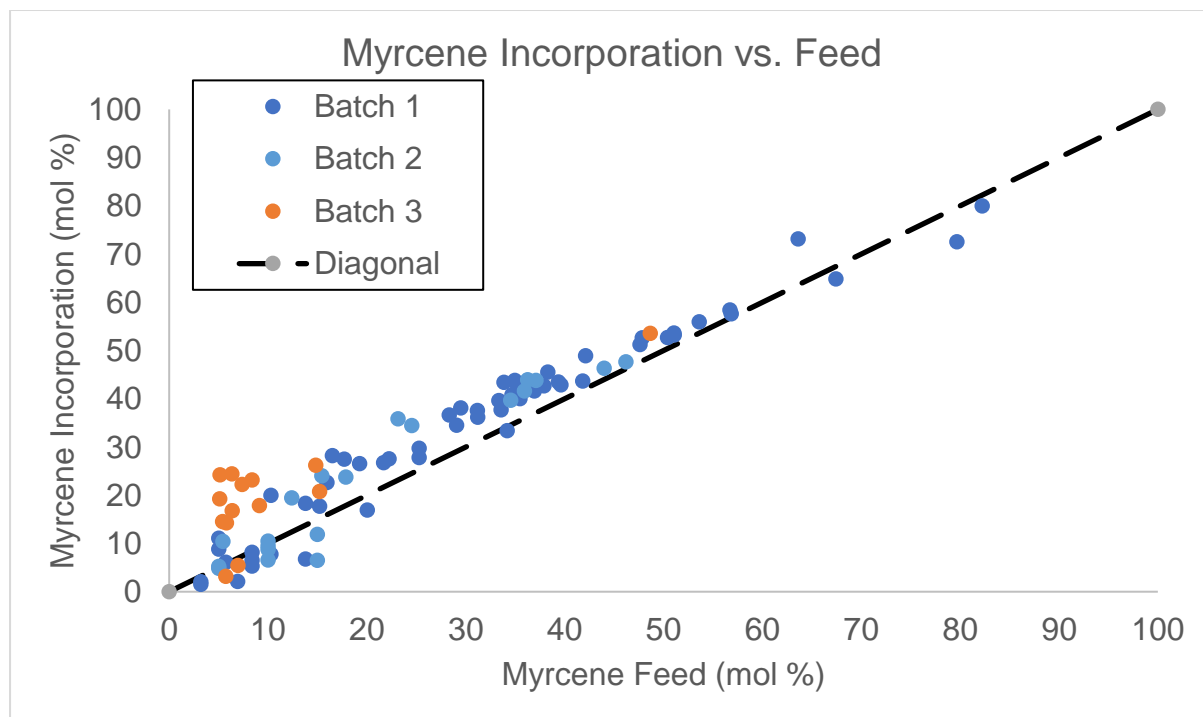

*Figure S13. Myrcene Incorporation plotted against Myrcene Feed.*

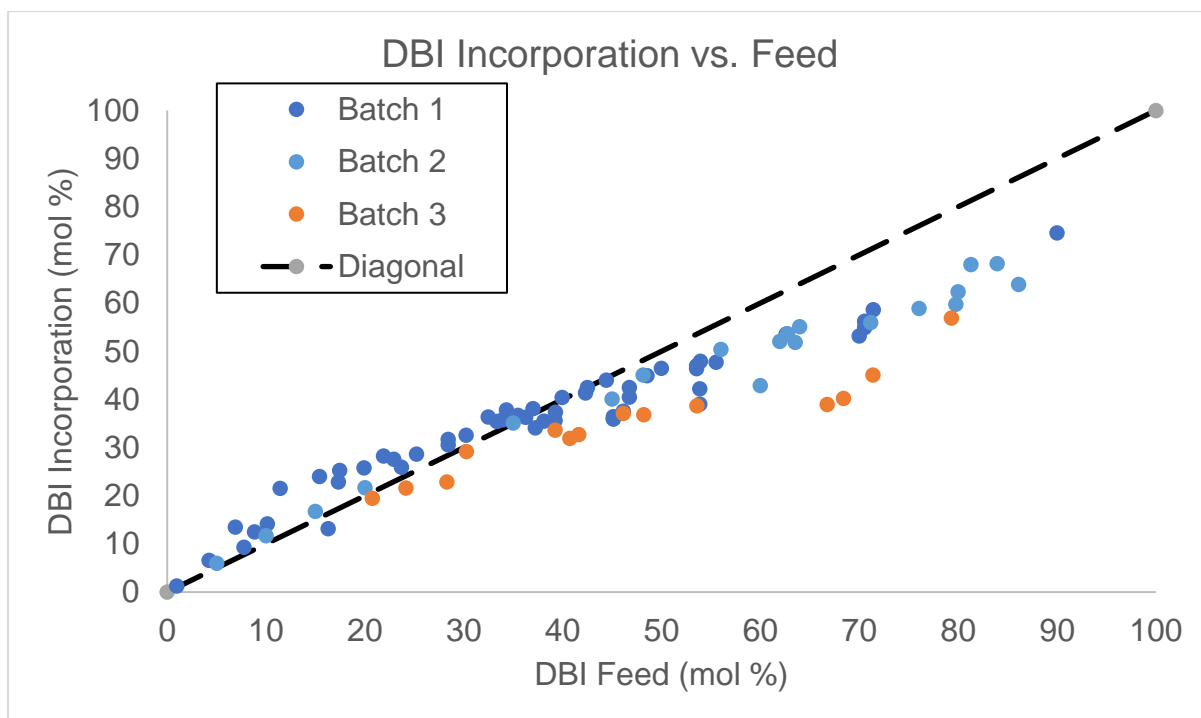

**Figure S14.** DBI Incorporation plotted against DBI Feed.

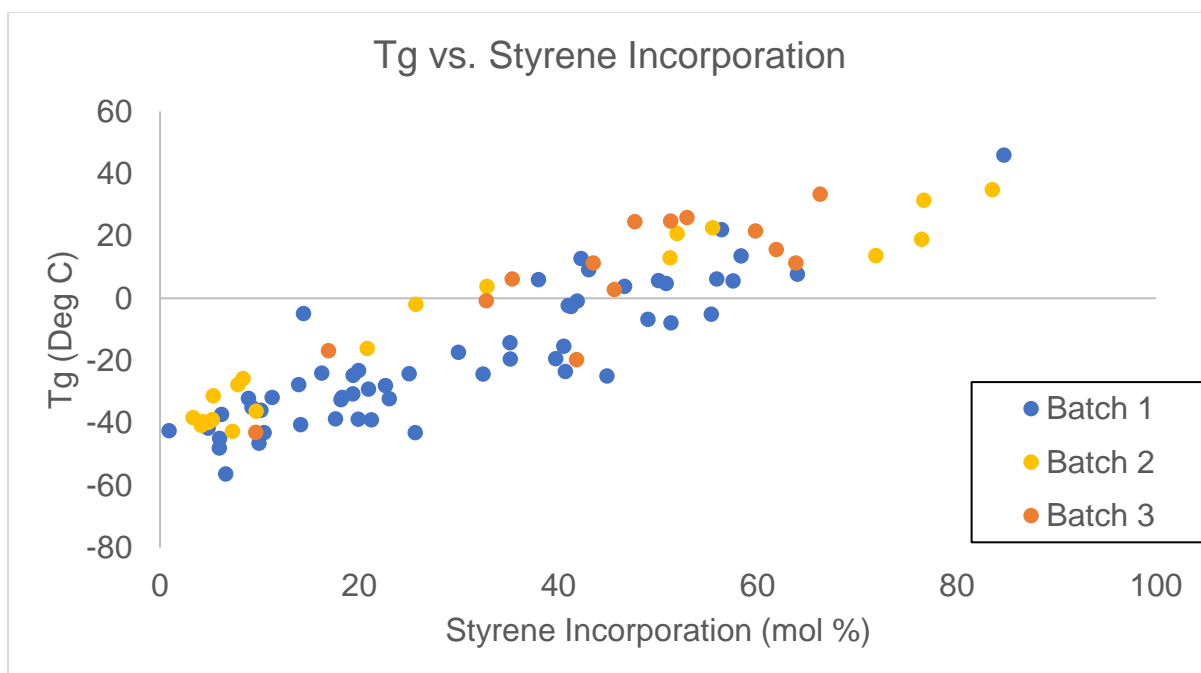

**Figure S15.** Tg plotted against Styrene Incorporation.



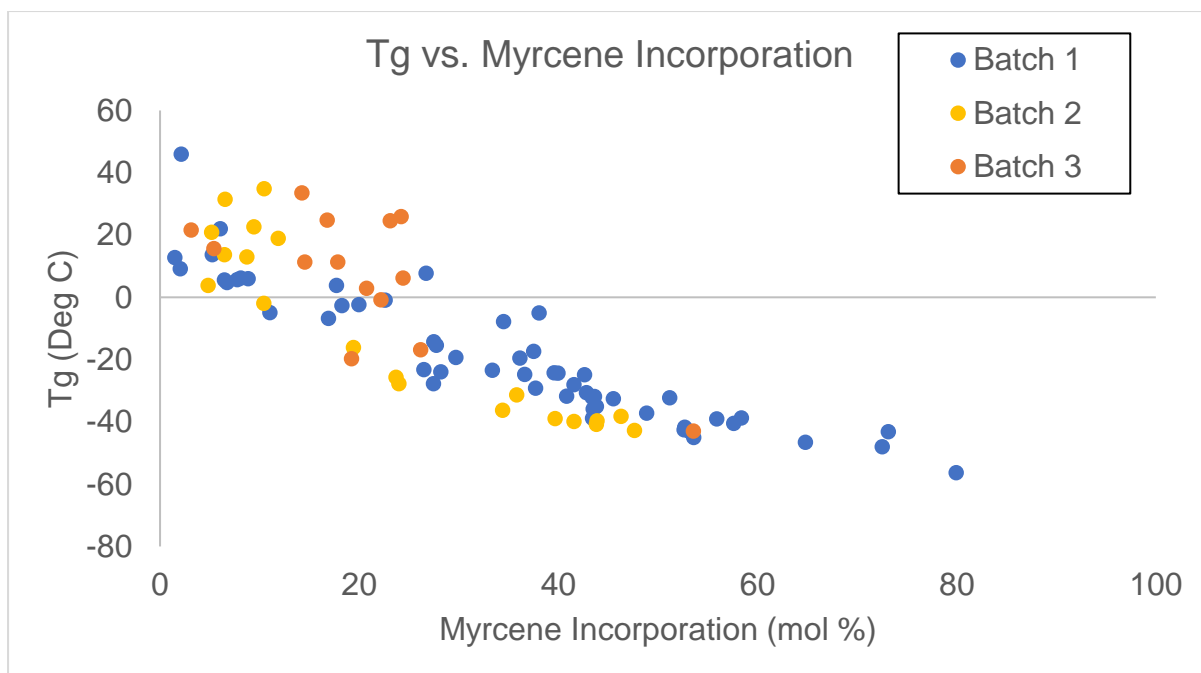

**Figure S16.** *Tg plotted against Myrcene Incorporation.*

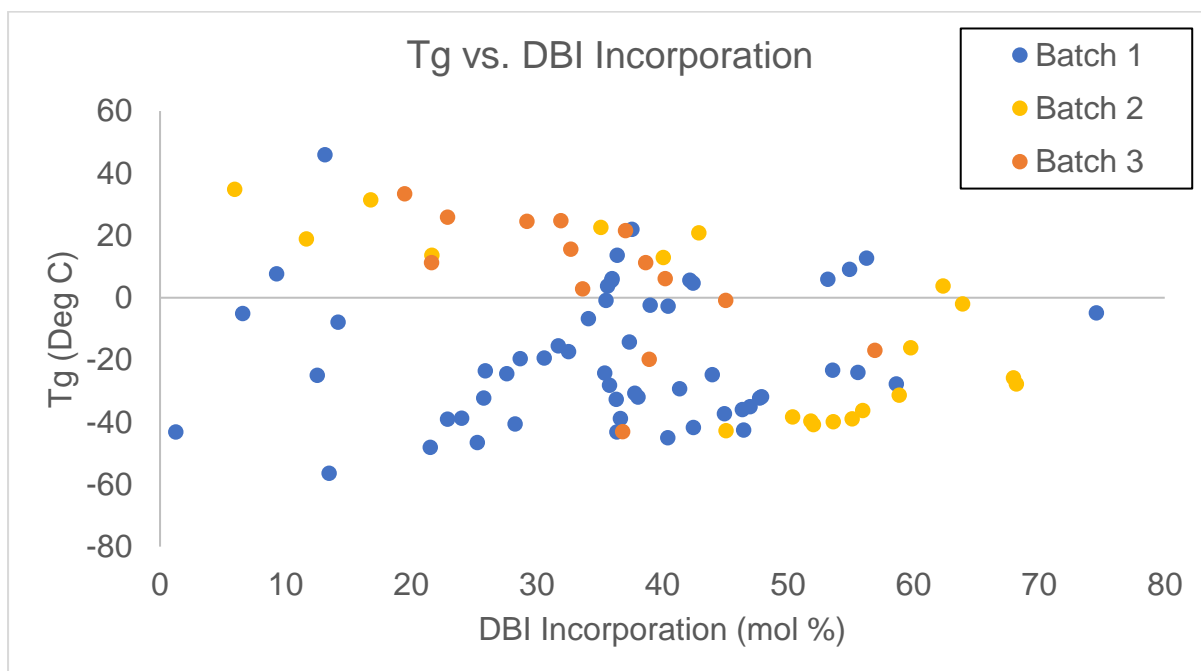

**Figure S17.** *Tg plotted against DBI Incorporation.*

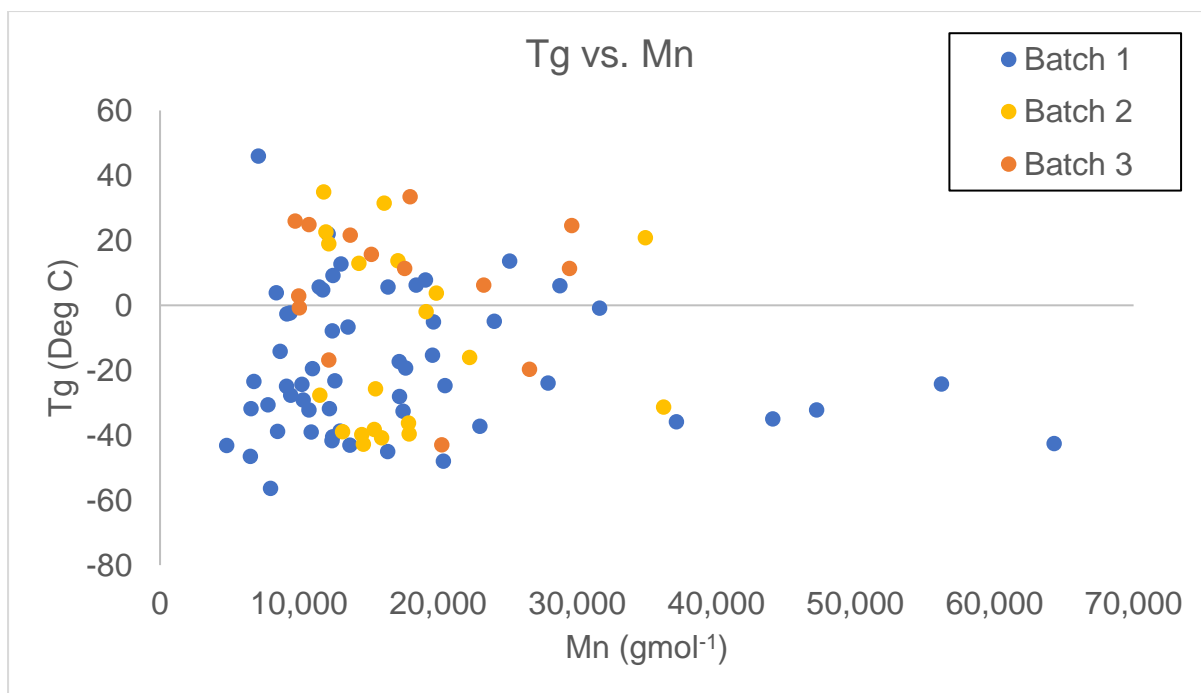

**Figure S18.** *Tg plotted against Mn.*

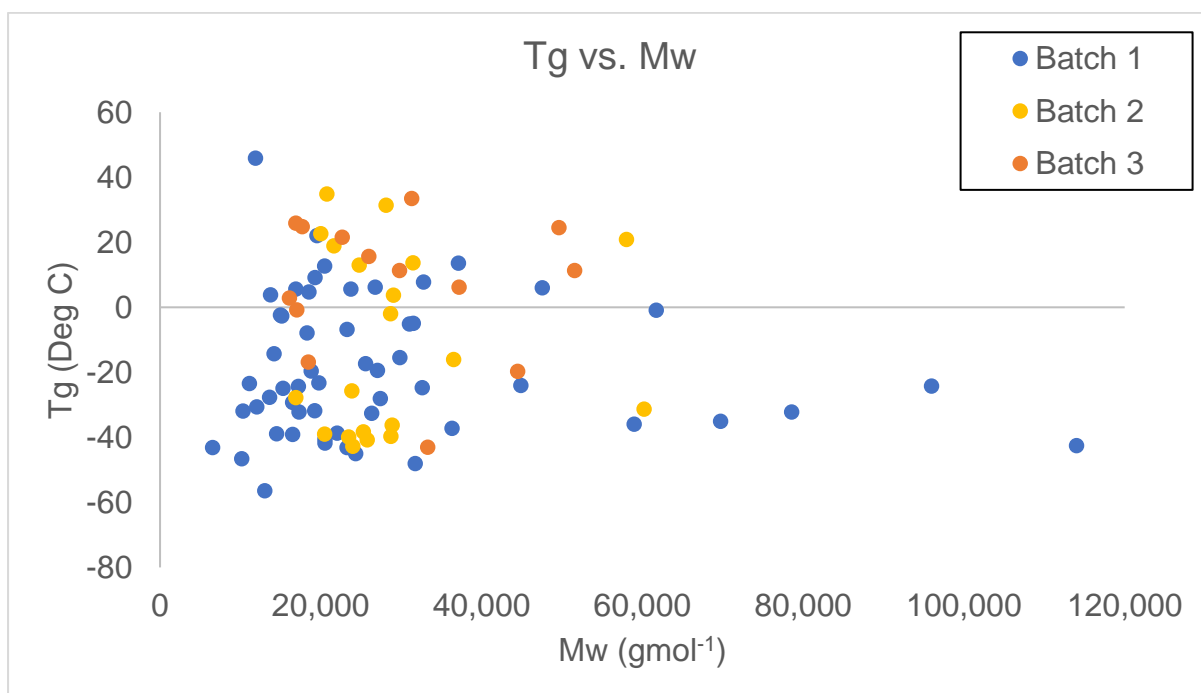

**Figure S19.** *Tg plotted against Mw.*

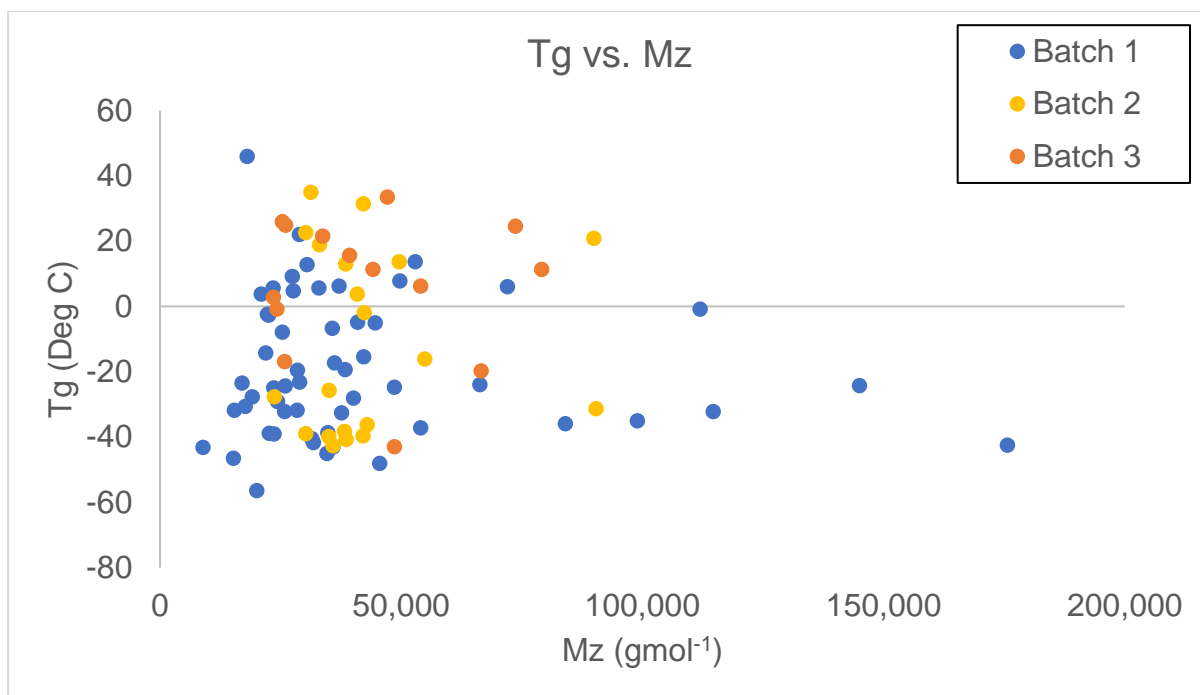

**Figure S20.** *Tg plotted against Mz.*

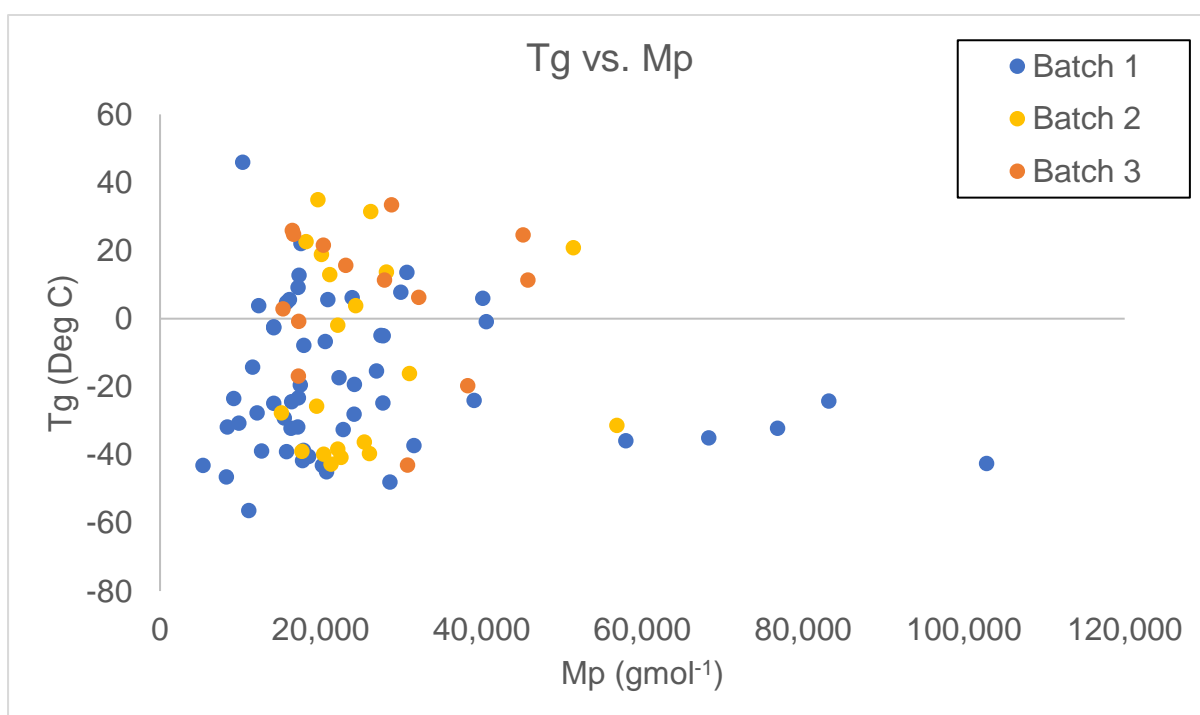

**Figure S21.** *Tg plotted against Mp.*

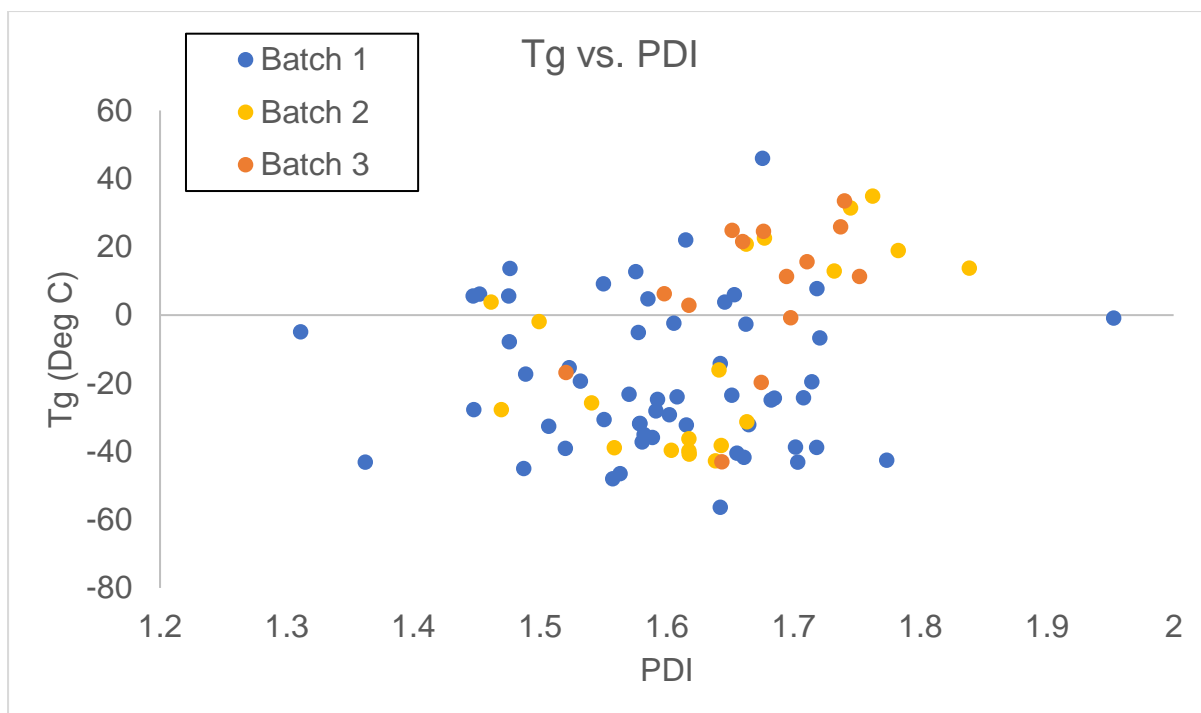

**Figure S22.** *Tg plotted against PDI.*

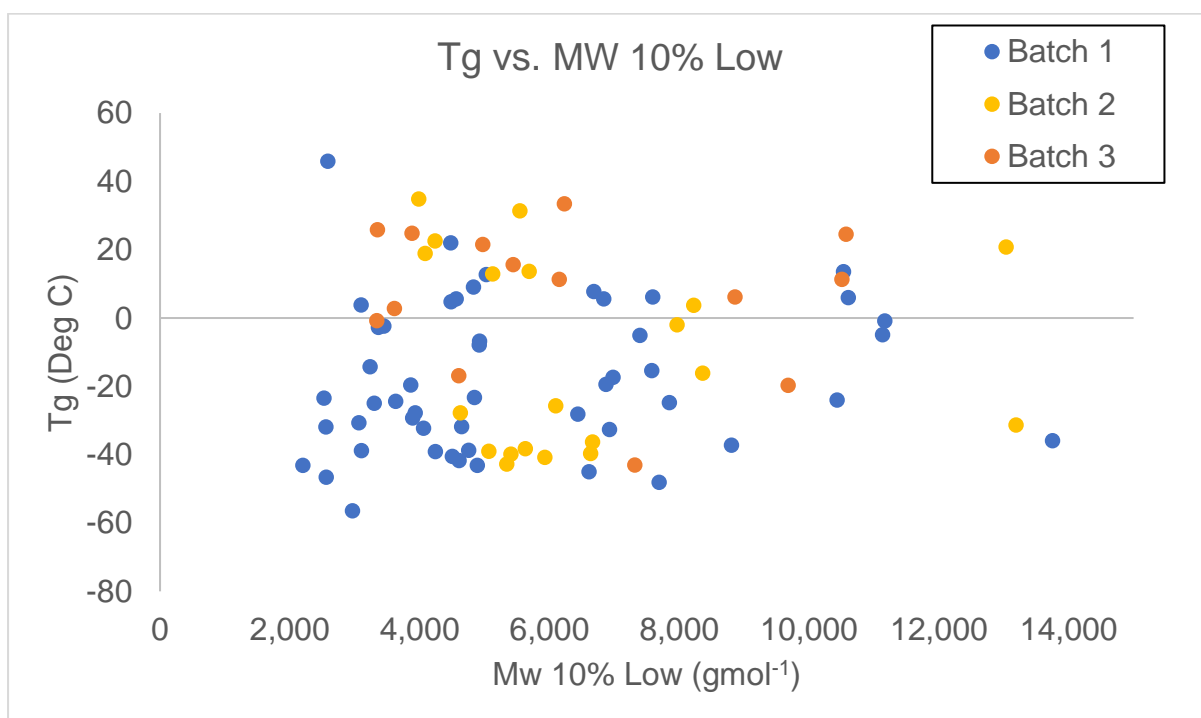

**Figure S23.** *Tg plotted against Mw 10% Low.*

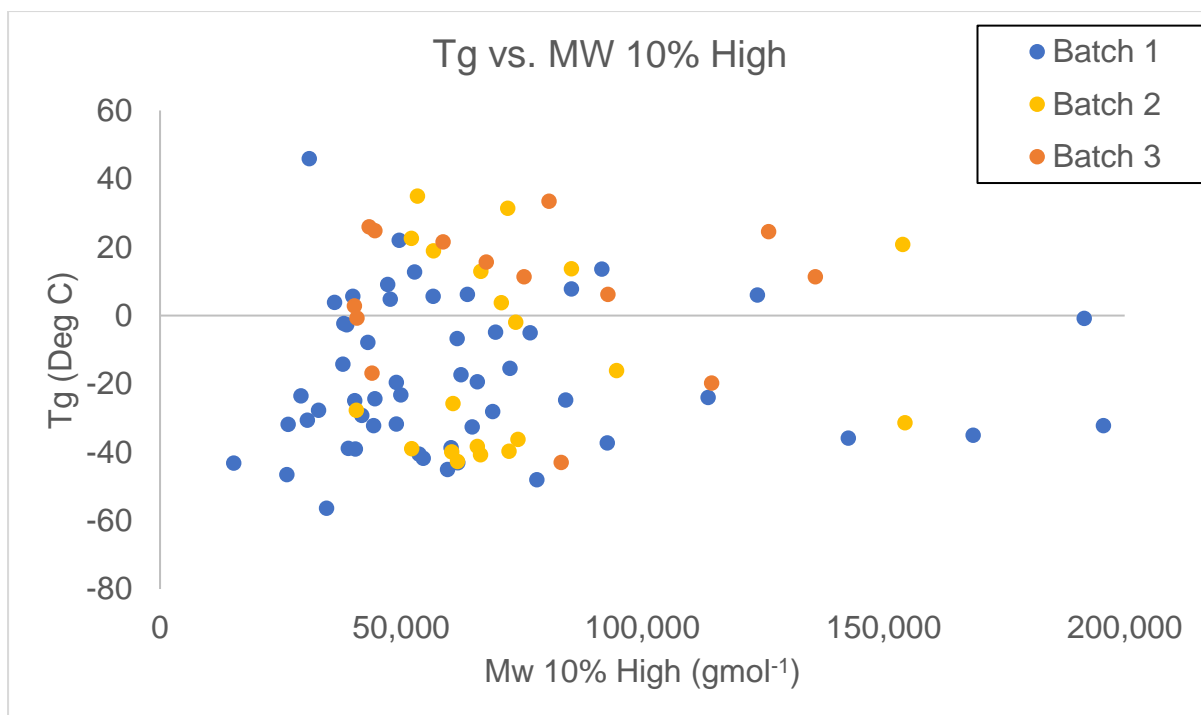

**Figure S24.** *Tg plotted against MW 10% High.*

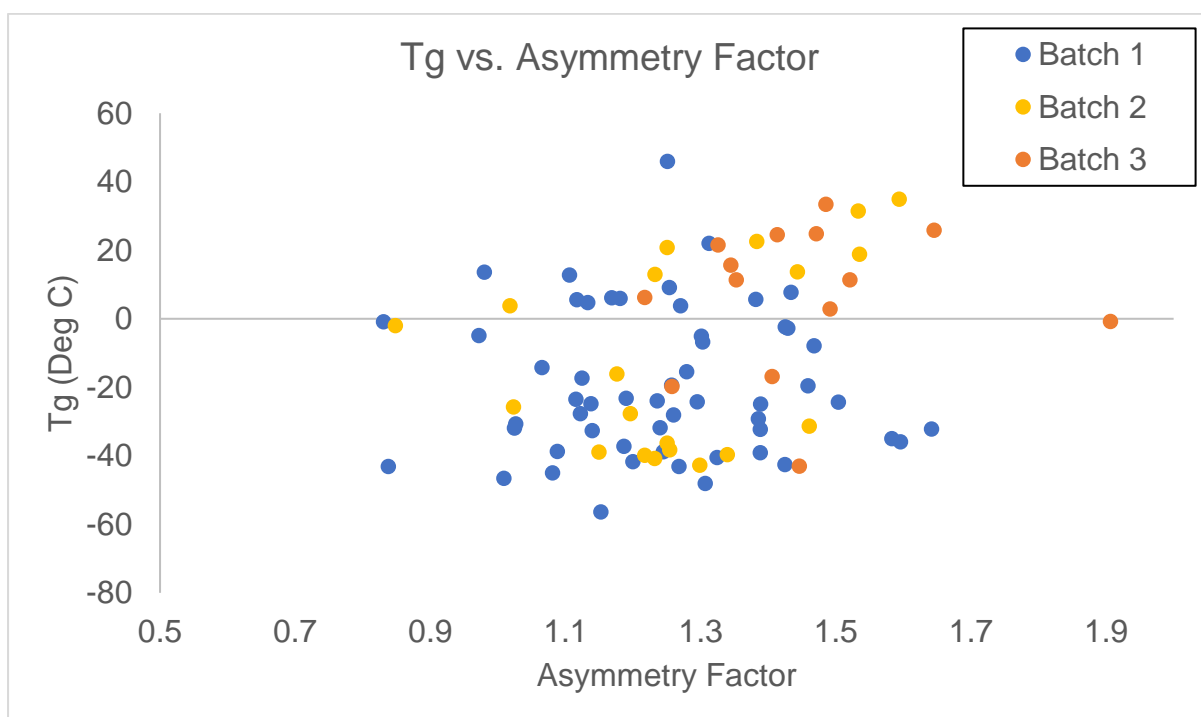

**Figure S25.** *Tg plotted against Asymmetry Factor.*

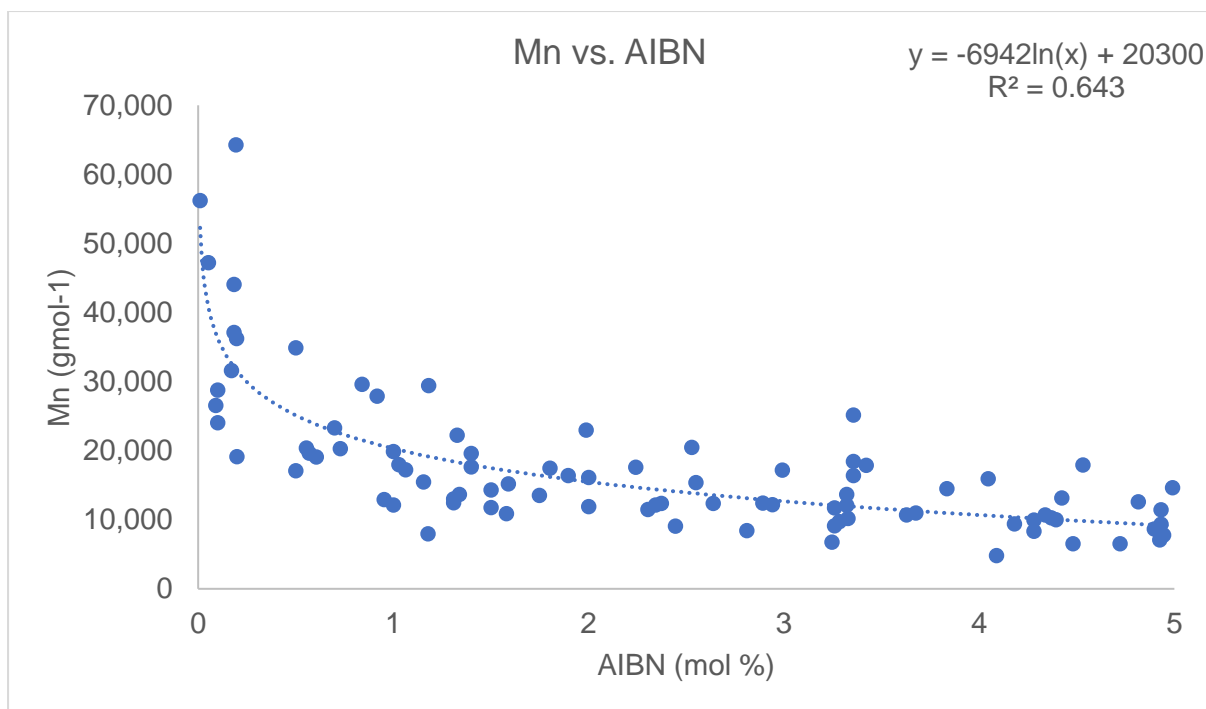

**Figure S26.** Mn plotted against AIBN (mol %).

## Reference

1. Sarkar, P.; Bhowmick, A. K. Green Approach toward Sustainable Polymer: Synthesis and Characterization of Poly(Myrcene-Co-Dibutyl Itaconate). *ACS Sustain. Chem. Eng.* **2016**, *4* (4), 2129–2141. <https://doi.org/10.1021/acssuschemeng.5b01591>.
